# Supplementary material
Source: MDPI journal article supplement (https://www.mdpi.com/1999-4907/11/3/311)
Supplement: s1 [file s1]

G1

0.0 em4me15-265  
13.2 EQ1819-150b  
16.8 em6me6-205  
19.1 EQ1636-250a  
20.5 em13me4-290c  
22.1 EQ2033-280  
23.6 EQ2417-250c  
24.6 EQ1989-200b  
25.0 em18me11-1600c  
25.4 EQ1989-200a  
25.8 em14me6-50c  
27.9 EQ1600-250a  
29.1 em6me8-330c  
29.2 DZ38-121c  
29.7 EQ1043-150  
31.4 EQ073-130  
31.7 em7me12-270c  
33.8 EQ1820-200a em9me11-150c  
34.1 EQ1508-170  
36.8 EQ184-251c  
38.7 EQ1829-290  
38.9 EQ1263-120  
41.2 em1me4-1500c  
43.1 EQ1735-210a  
43.4 DZ159-201c  
44.5 EQ489-150a  
44.6 em3me9-350  
45.5 EQ1813-270a  
45.7 DZ165-301c  
46.4 EQ1600-250c  
46.8 em1me26-2400  
48.7 E1M6-245  
48.9 EQ94-171a  
49.8 em13me4-620  
49.8 em2me13-70  
50.2 EQ1484-230  
50.3 EQ1819-150c  
50.4 em13me5-200  
51.9 EQ195-205  
53.2 EQ2033-300  
54.2 EQ1425-320  
54.6 em1me26-110  
55.2 DZ159-150  
56.7 EQ1317-110c  
56.9 DZ126-301c  
58.0 DZ159-180  
58.1 DZ4-141c  
58.9 em9me5-300  
60.0 EQ1821-250a  
60.4 EQ425-400  
60.6 em15me10-60  
62.0 em11me12-220  
62.2 EQ1461-205  
62.5 em3me3-320  
63.5 E1M2-60  
63.7 em5me14-150  
64.0 E2M6-204  
65.0 em1me6-255  
65.1 em9me15-1300  
65.8 EQ822-250 DZ159-170  
66.6 em5me14-330  
67.0 em2me13-200  
68.4 UBC808-420  
70.6 EQ120-1000 DZ159-320  
70.7 em1me6-1600  
71.8 em1me4-560  
72.5 EQ94-170b  
72.9 EQ767-200a  
73.9 EQ1815-800  
74.2 em3me13-390 DZ158-320  
75.0 em4me3-150  
75.4 EQ580-180b  
75.5 DZ140-341c DZ159-145  
76.0 em6me10-480  
76.1 em5me4-100  
77.0 em2me2-70  
77.6 EQ425-500 EQ632-100  
78.1 EQ38-125  
78.6 em8me11-800  
79.6 EQ1425-370b em56me4-50  
80.1 em1me14-900  
80.1 E3M4-245  
82.4 EBM8-125  
82.9 em10me6-2000 em11me14-590  
83.6 DZ159-280  
84.0 DZ158-240  
85.1 em1me6-200c  
85.6 em4me19-175  
86.8 em9me5-310  
88.1 em9me10-290c  
88.2 EBM8-115  
89.7 DZ159-260  
90.9 em15me19-290  
91.0 em3me15-1100  
92.4 em4me7-390 DZ158-270  
93.7 EQ2058-180c  
93.8 em13me4-390  
94.2 em8me26-1300c  
96.0 em8me11-120  
97.2 em13me4-480c  
98.7 em6me14-250c  
99.3 em4me11-140c  
100.0 em9me15-390  
101.1 em11me14-380  
101.2 em53me13-320  
102.8 em4me9-400c  
103.1 em4me3-2350  
105.2 em13me4-190c  
105.5 EQ958-150b  
106.7 em5me8-710c  
107.4 em8me11-500  
107.7 em1me4-140c  
107.7 EQ2178-200  
108.7 em4me3-2300  
110.5 EQ855-250a  
111.4 em4me3-2400  
112.8 DZ32-210  
114.3 em4me3-1000  
116.9 em9me15-650  
118.1 GEU219-200a  
119.0 em4me4-80  
120.4 DZ159-161c  
120.5 em25me28-110c  
123.1 em4me11-120  
123.9 EQ958-150a DZ184-281c  
125.5 em2me13-100  
127.1 DZ36-180  
131.1 DZ36-250  
133.0 DZ36-172  
133.2 em1me14-2400c em4me11-135  
136.0 DZ36-205  
136.2 GEU219-200c  
140.3 em45me6-620  
141.7 em3me9-450c  
142.6 DZ64-181c  
149.2 DZ36-170  
162.9 em12me11-300

G2

0.0 em1me1-950  
4.4 em1me20-790  
8.7 EQ125-1000 em9me15-550  
12.3 em14me3-580  
21.9 EQ1178-130  
22.4 EQ954-300  
23.5 em8me26-370  
24.3 em8me11-250  
24.9 DZ157-200  
25.2 em1me3-290  
26.8 em9me9-150  
27.4 em3me7-550  
28.6 EQ436-250 em18me11-320  
29.6 em1me14-170  
30.1 EQ265-280  
31.1 em24me11-310  
32.5 em1me14-110  
34.1 em18me11-255  
34.8 EQ298-300a  
35.5 em25me28-320  
36.2 em8me11-190  
36.8 em9me11-490 EQ125-2000  
37.7 em1me14-2100  
38.6 em9me15-120  
39.4 em1me10-250  
40.0 em1me20-220  
42.4 EQ82-300 em14me8-120  
43.1 EQ458-175  
43.8 em5me14-110  
44.1 em13me3-100  
44.9 EQ199-800  
45.5 em8me10-2280  
46.9 em5me22-198  
47.4 EQ2155-275  
48.1 EQ340-250  
48.6 em3me20-100  
48.6 em16me13-800  
49.6 em16me6-190  
50.5 em3me11-140  
51.7 em3me26-185  
52.2 em6me3-820  
53.1 em1me6-80  
54.2 em14me8-135  
54.6 em1me25-340  
54.9 em14me6-130  
55.8 em8me10-950  
56.4 em5me14-600  
57.3 em8me10-2320  
58.3 EQ404-200c  
59.7 em16me13-100  
60.3 em5me14-800  
61.1 em16me6-170  
61.7 em3me20-180  
62.0 em8me10-2410  
62.9 em15me13-900  
63.4 EQ179-200  
64.5 em12me7-170  
65.1 em1me20-2000  
65.3 em9me15-1200  
66.0 em4me15-230  
66.8 em3me7-210  
67.2 em4me13-1620  
68.0 em1me14-90 EQ291-200b  
69.6 UBC873-950  
70.0 EQ2089-170  
71.1 em12me7-130  
73.0 UBC880-460  
73.6 em4me13-220  
74.3 em63me13-212  
76.3 UBC880-630  
77.7 em6me3-135 EQ137-200  
78.0 em4me15-550  
79.3 UBC865-2200  
80.2 EQ139-300  
80.5 em3me4-261  
80.9 em12me7-360  
81.9 em12me9-260  
83.0 em5me10-860  
84.1 em6me3-780  
84.2 em4me7-900 EQ137-300  
86.0 em16me4-500  
87.6 em9me6-227  
87.6 em13me11-50  
91.5 em16me6-280  
93.4 em13me12-470  
95.7 em8me10-1500  
97.3 em56me4-2100

G3

0.0 E5M4-500  
2.0 E3M6-600  
4.9 EQ287-120a E7M8-500  
8.7 E1M5-250  
9.9 E6M4-280  
16.1 E6M4-350  
18.7 E7M4-60  
22.4 E1M2-600 EQ321-250  
24.1 E6M4-280  
27.3 E5M4-600  
29.2 E8M5-320  
29.6 E7M4-570  
32.2 EQ490-300 E8M8-440  
37.3 E7M6-50  
38.5 E4M2-500  
39.3 E4M6-250  
41.1 E7M6-360  
42.8 E5M4-700  
44.7 E6M4-210  
48.1 E5M4-680  
48.5 EQ389-100 E8M8-530  
48.9 E1M5-180  
50.9 E8M8-250  
51.0 E7M6-350  
52.9 E6M4-80  
55.6 E5M4-650  
57.4 E4M8-470  
58.6 E1M8-100  
60.0 E7M6-610  
62.5 E7M6-300 EQ299-300b  
64.1 E3M4-300  
66.2 E6M4-130  
66.7 E7M6-540 EQ457-200b  
69.9 E6M4-320  
71.6 E4M8-480  
71.9 E7M6-240  
76.2 E1M1-250  
77.1 em8me10-2150  
78.2 E6M4-50  
80.1 E7M4-280  
80.9 E1M1-300  
82.2 E1M1-320  
82.9 em5me14-180  
83.4 E7M4-280  
83.6 E7M8-380  
86.2 em49me9-2250  
87.5 E3M4-370  
88.4 em1me9-2300  
89.5 EQ2129-270c  
92.4 E6M6-440 E8M8-60  
93.8 EQ1272-200  
94.0 em1me2-2000c  
96.1 E8M8-160  
96.3 E5M4-450  
97.7 EQ389-200a E7M4-600  
98.5 E7M4-300  
99.0 EQ2129-270a  
104.7 em1me2-2200  
105.2 EQ2095-220  
105.8 em1me4-2300  
110.1 E6M4-150 E1M1-400  
110.4 EQ199-180a  
115.9 em1me6-2100  
118.8 em1me11-2200  
120.8 GEU155-250a  
122.7 E3M4-330  
124.2 E6M4-110  
126.1 GEU158-100b  
128.8 em44me9-115  
131.9 E1M5-400  
134.2 GEU158-100a  
136.5 em10me6-650  
139.9 EQ308-280  
143.6 EQ1974-270  
146.5 EQ1745-160b  
150.3 EQ1745-160a  
152.2 em32me19-2150  
152.4 DZ32-320  
157.4 GEU155-250b  
159.8 DZ32-310  
166.6 EQ321-200  
172.2 DZ32-420

G4

0.0 em2me6-440  
2.7 em24me11-380  
4.6 em6me25-135  
7.5 EQ389-200b em7me28-270  
10.3 DZ4-210  
13.9 em32me27-520  
14.8 em2me6-130  
16.3 em20me11-245  
17.9 em4me8-195  
19.4 em5me14-260 EQ149-200a  
21.0 em12me7-180  
23.6 em5me14-320  
25.2 em25me22-1400  
25.4 DZ165-325  
25.8 em4me15-115  
26.8 em2me6-150  
28.6 em9me9-1000  
29.5 em32me27-2450  
29.8 DZ64-182  
30.1 em56me4-1100  
30.5 em12me5-330  
31.0 em8me11-330  
31.9 em8me10-2400  
32.5 em8me11-270  
33.3 em26me13-2200  
34.1 GEU155-250a  
35.2 em1me1-750  
36.1 em25me28-190  
37.7 DZ165-260  
38.3 em9me9-220  
38.9 GEU045-260  
39.3 EQ854-280b  
40.8 EQ2127-120  
41.7 em9me9-155  
42.2 EQ854-280a  
42.8 em4me7-250  
43.9 em20me11-175  
45.0 em4me4-330  
46.2 em1me6-175  
46.8 DZ4-310  
47.6 EQ2127-145  
48.2 UBC869-950  
48.5 EQ185-250  
49.2 EQ1387-250a  
51.0 UBC873-1200  
51.9 em4me13-130  
52.3 EQ1727-140a  
52.5 em4me15-185  
53.8 GEU053-210  
54.4 em24me11-480  
56.2 GEU159-300c em4me13-100  
57.1 em8me11-1000  
57.5 em8me10-1600  
59.2 em4me15-175  
59.6 em25me28-160  
60.9 DZ165-340  
61.3 em9me9-800  
61.5 EQ1727-140b  
62.4 DZ4-360  
63.7 EQ1261-200a  
64.8 UBC866-1900  
65.9 em9me9-1100  
66.6 DZ4-370  
71.5 DZ4-340  
72.9 UBC868-2150  
74.4 em4me13-1100  
75.7 em4me15-180  
75.9 em9me9-300  
79.1 UBC867-1700



G1

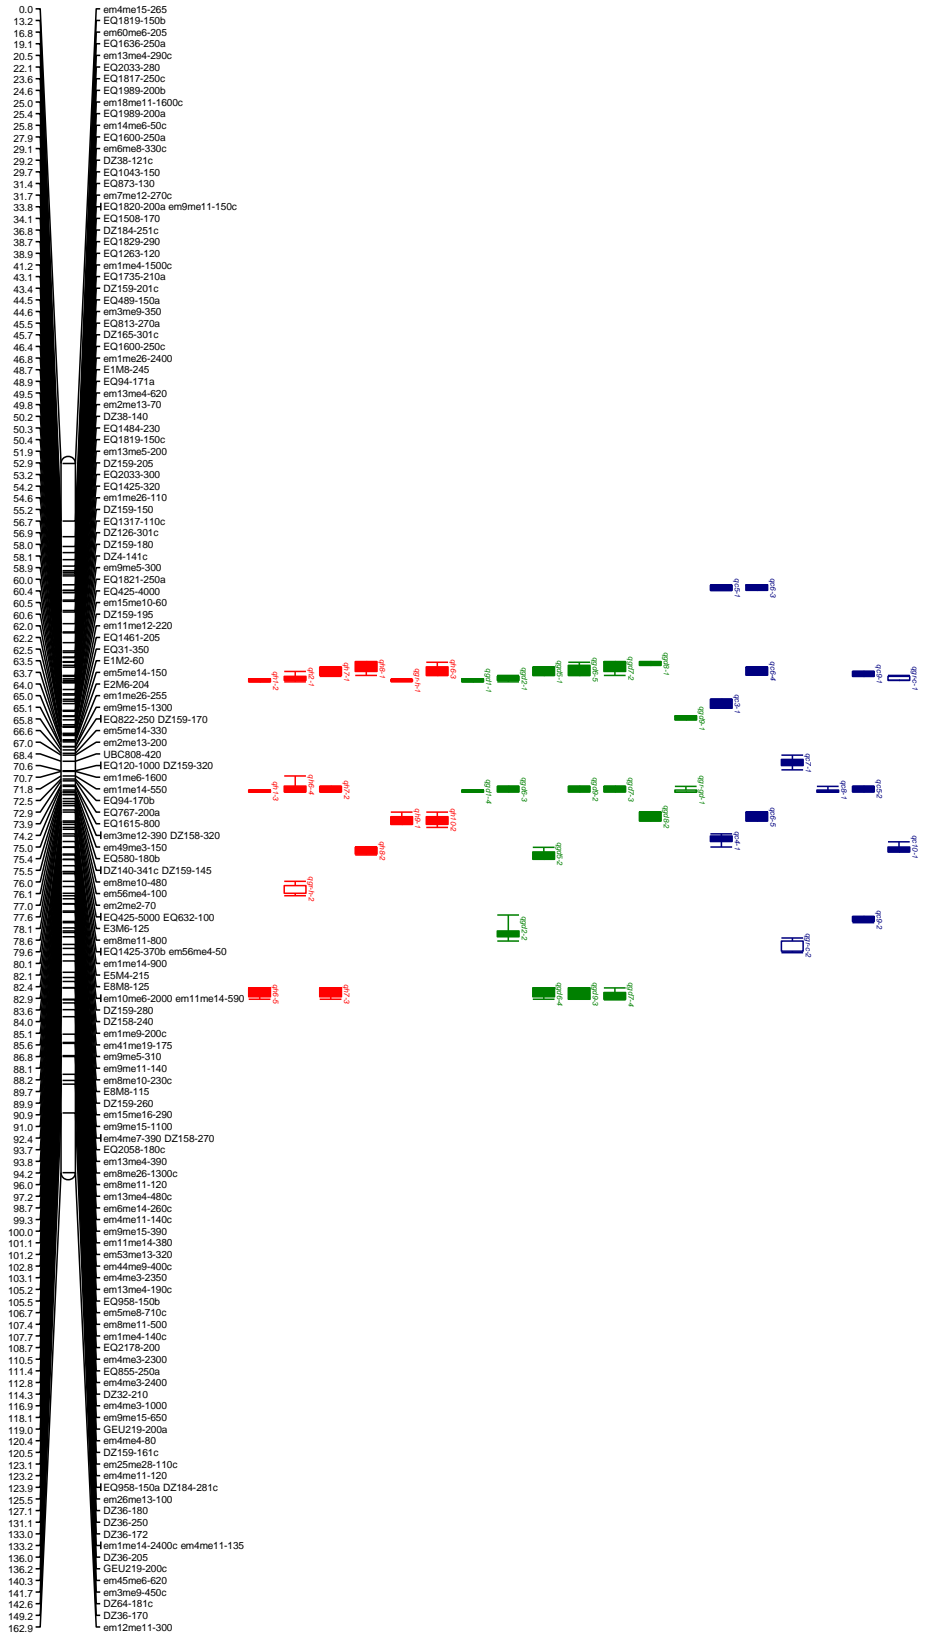

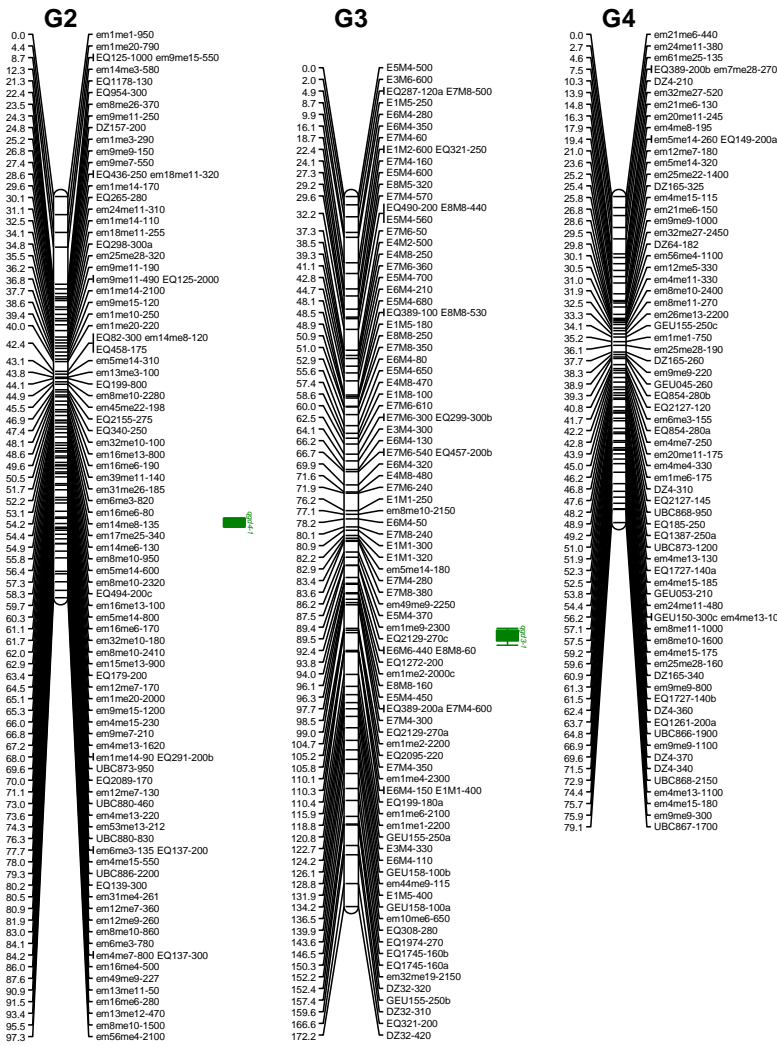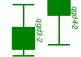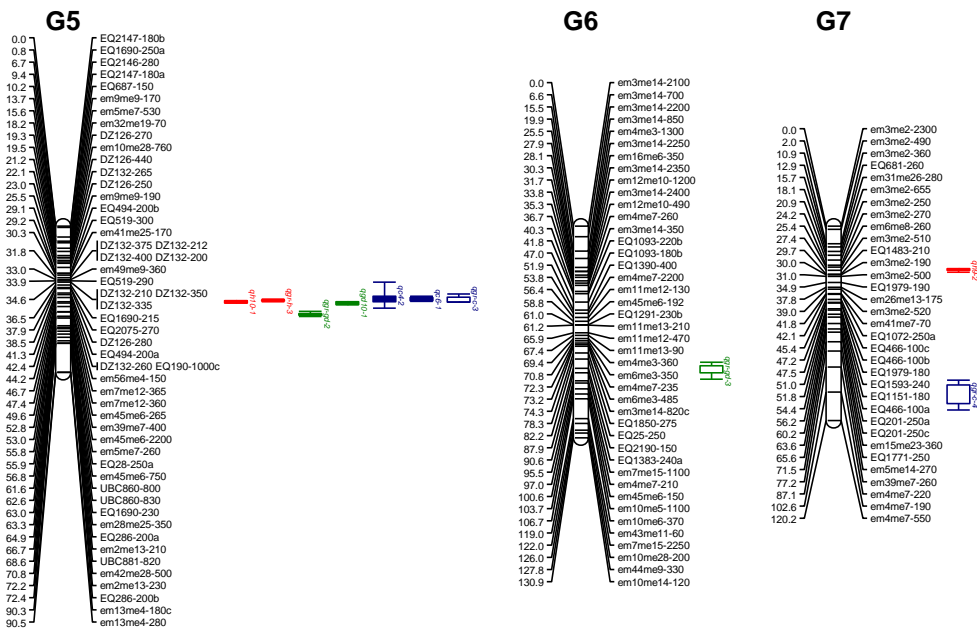

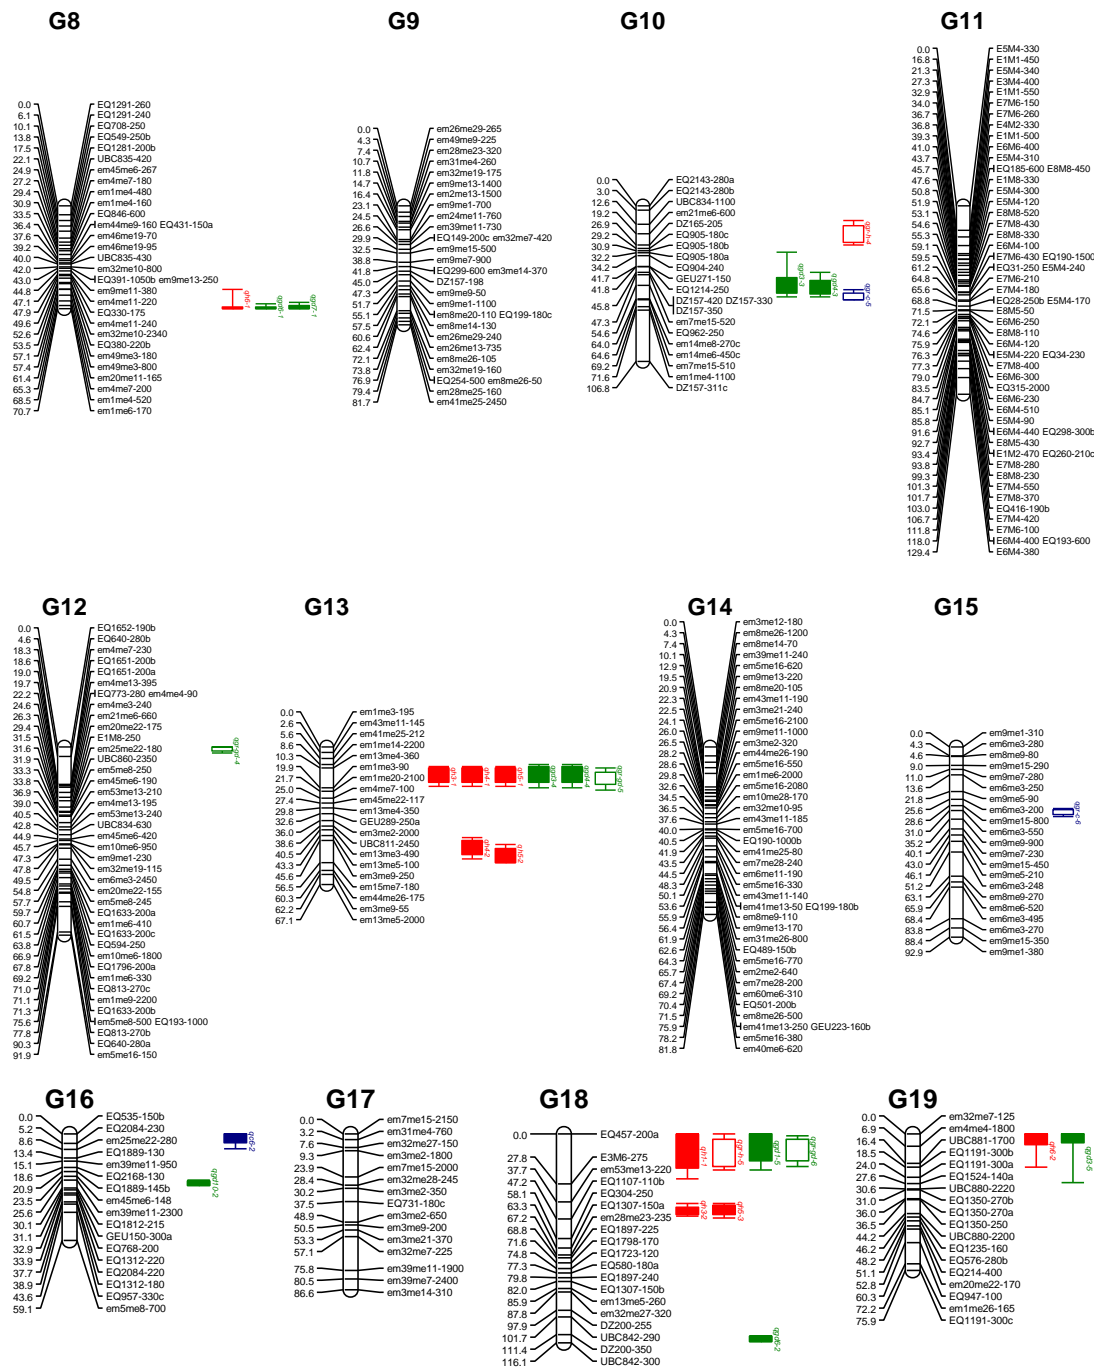

**Figure S1-2** The location of growth-related QTLs mapped on 19 linkage groups of *Eucommia ulmoides*.

The marker name were listed on the right and consisted of the primer name and the band size (bp).The location (cM) of markers in the linkage group were listed on the left. Red, green and blue bars represent QTLs for height (H), ground diameter (GD) and crown diameter (C), respectively. The hollow bars represents QTLs for growth rates. Thick bars and thin lines represent 1-LOD and 2-LOD confidence intervals of each QTL, respectively. QTL named using q added an abbreviation of the trait, followed by the year (1 for 2010, 2 for 2011, and so on) and the QTL number.
