# Supplementary material
Source: MDPI journal article supplement (https://www.mdpi.com/1999-4907/11/3/311)
Supplement: s1 [file s1]

**Table S2.** Segregation of SSR locus

| No. | Locus       | Segregation | X2   | Signif. | Classification | ratio |
|-----|-------------|-------------|------|---------|----------------|-------|
| 1   | GEU037-260  | <lmxll>     | 0.66 | -       | [ll:lm]        | 1:1   |
| 2   | GEU045-260  | <lmxll>     | 0.66 | -       | [ll:lm]        | 1:1   |
| 3   | GEU052-270a | <lmxll>     | 0.95 | -       | [ll:lm]        | 1:1   |
| 4   | GEU052-270b | <nnxnp>     | 0.66 | -       | [nn:np]        | 1:1   |
| 5   | GEU052-270c | <nnxnp>     | 3.18 | *       | [nn:np]        | 1:1   |
| 6   | GEU052-270d | <lmxll>     | 0.95 | -       | [ll:lm]        | 1:1   |
| 7   | GEU053-200  | <nnxnp>     | 0.03 | -       | [nn:np]        | 1:1   |
| 8   | GEU053-210  | <hkxhk>     | 2.25 | -       | [hh+hk+h-:kk]  | 3:1   |
| 9   | GEU056-240  | <lmxll>     | 1.68 | -       | [ll:lm]        | 1:1   |
| 10  | GEU150-300a | <lmxll>     | 0.03 | -       | [ll:lm]        | 1:1   |
| 11  | GEU150-300b | <nnxnp>     | 0.11 | -       | [nn:np]        | 1:1   |
| 12  | GEU150-300c | <hkxhk>     | 2.25 | -       | [hh+hk+h-:kk]  | 3:1   |
| 13  | GEU155-250a | <nnxnp>     | 0.24 | -       | [nn:np]        | 1:1   |
| 14  | GEU155-250b | <nnxnp>     | 0.95 | -       | [nn:np]        | 1:1   |
| 15  | GEU155-250c | <lmxll>     | 0.95 | -       | [ll:lm]        | 1:1   |
| 16  | GEU158-100a | <nnxnp>     | 1.29 | -       | [nn:np]        | 1:1   |
| 17  | GEU158-100b | <nnxnp>     | 1.68 | -       | [nn:np]        | 1:1   |
| 18  | GEU219-200a | <lmxll>     | 0.42 | -       | [ll:lm]        | 1:1   |
| 19  | GEU219-200b | <hkxhk>     | 1.26 | -       | [hh+hk+h-:kk]  | 3:1   |
| 20  | GEU219-200c | <nnxnp>     | 0.24 | -       | [nn:np]        | 1:1   |
| 21  | GEU223-160a | <lmxll>     | 0.11 | -       | [ll:lm]        | 1:1   |
| 22  | GEU223-160b | <hkxhk>     | 0.32 | -       | [hh+hk+h-:kk]  | 3:1   |
| 23  | GEU223-220a | <lmxll>     | 3.18 | *       | [ll:lm]        | 1:1   |
| 24  | GEU223-220b | <nnxnp>     | 0.11 | -       | [nn:np]        | 1:1   |
| 25  | GEU239-150  | <lmxll>     | 0    | -       | [ll:lm]        | 1:1   |
| 26  | GEU239-300  | <nnxnp>     | 0.11 | -       | [nn:np]        | 1:1   |
| 27  | GEU239-350  | <nnxnp>     | 2.63 | -       | [nn:np]        | 1:1   |
| 28  | GEU271-150  | <lmxll>     | 0.42 | -       | [ll:lm]        | 1:1   |
| 29  | GEU289-250a | <hkxhk>     | 2.84 | *       | [hh+hk+h-:kk]  | 3:1   |
| 30  | GEU289-250b | <lmxll>     | 0    | -       | [ll:lm]        | 1:1   |
| 31  | GEU289-250c | <nnxnp>     | 0.95 | -       | [nn:np]        | 1:1   |
| 32  | EQ25-250    | <nnxnp>     | 0.95 | -       | [nn:np]        | 1:1   |
| 33  | EQ28-250a   | <lmxll>     | 0.95 | -       | [ll:lm]        | 1:1   |
| 34  | EQ28-250b   | <nnxnp>     | 0.11 | -       | [nn:np]        | 1:1   |
| 35  | EQ28-250c   | <lmxll>     | 2.13 | -       | [ll:lm]        | 1:1   |
| 36  | EQ31-250    | <nnxnp>     | 0.03 | -       | [nn:np]        | 1:1   |
| 37  | EQ31-350    | <nnxnp>     | 0.11 | -       | [nn:np]        | 1:1   |
| 38  | EQ45-120    | <nnxnp>     | 3.79 | *       | [nn:np]        | 1:1   |
| 39  | EQ82-300    | <nnxnp>     | 1.68 | -       | [nn:np]        | 1:1   |
| 40  | EQ85-800    | <nnxnp>     | 0.95 | -       | [nn:np]        | 1:1   |
| 41  | EQ94-170b   | <hkxhk>     | 1.26 | -       | [hh+hk+h-:kk]  | 3:1   |
| 42  | EQ94-171a   | <hkxhk>     | 1.26 | -       | [hh+hk+h-:kk]  | 3:1   |

| No. | Locus       | Segregation | X2    | Signif. | Classification | ratio |
|-----|-------------|-------------|-------|---------|----------------|-------|
| 43  | EQ94-210    | <hkxhk>     | 3.51  | *       | [hh+hk+h-:kk]  | 3:1   |
| 44  | EQ94-240    | <hkxhk>     | 0.04  | -       | [hh+hk+h-:kk]  | 3:1   |
| 45  | EQ95-250    | <nnxnp>     | 3.79  | *       | [nn:np]        | 1:1   |
| 46  | EQ99-140    | <nnxnp>     | 1.29  | -       | [nn:np]        | 1:1   |
| 47  | EQ105-250   | <nnxnp>     | 3.18  | *       | [nn:np]        | 1:1   |
| 48  | EQ118-200   | <lmxll>     | 1.68  | -       | [ll:lm]        | 1:1   |
| 49  | EQ118-500a  | <lmxll>     | 2.63  | -       | [ll:lm]        | 1:1   |
| 50  | EQ118-500b  | <lmxll>     | 0     | -       | [ll:lm]        | 1:1   |
| 51  | EQ119-200   | <lmxll>     | 0.03  | -       | [ll:lm]        | 1:1   |
| 52  | EQ119-300   | <lmxll>     | 2.13  | -       | [ll:lm]        | 1:1   |
| 53  | EQ120-1000  | <nnxnp>     | 0.42  | -       | [nn:np]        | 1:1   |
| 54  | EQ120-700   | <nnxnp>     | 2.63  | -       | [nn:np]        | 1:1   |
| 55  | EQ125-1000  | <nnxnp>     | 0.42  | -       | [nn:np]        | 1:1   |
| 56  | EQ125-2000  | <nnxnp>     | 0     | -       | [nn:np]        | 1:1   |
| 57  | EQ137-200   | <nnxnp>     | 0.11  | -       | [nn:np]        | 1:1   |
| 58  | EQ137-300   | <nnxnp>     | 0.42  | -       | [nn:np]        | 1:1   |
| 59  | EQ139-220   | <nnxnp>     | 0.11  | -       | [nn:np]        | 1:1   |
| 60  | EQ139-300   | <nnxnp>     | 3.79  | *       | [nn:np]        | 1:1   |
| 61  | EQ144-500   | <nnxnp>     | 0.24  | -       | [nn:np]        | 1:1   |
| 62  | EQ149-200a  | <lmxll>     | 0.42  | -       | [ll:lm]        | 1:1   |
| 63  | EQ149-200b  | <nnxnp>     | 0.42  | -       | [nn:np]        | 1:1   |
| 64  | EQ149-200c  | <lmxll>     | 0.66  | -       | [ll:lm]        | 1:1   |
| 65  | EQ156-200   | <nnxnp>     | 0.95  | -       | [nn:np]        | 1:1   |
| 66  | EQ156-250   | <nnxnp>     | 0.11  | -       | [nn:np]        | 1:1   |
| 67  | EQ172-300   | <nnxnp>     | 0.42  | -       | [nn:np]        | 1:1   |
| 68  | EQ179-200   | <nnxnp>     | 0.24  | -       | [nn:np]        | 1:1   |
| 69  | EQ185-250   | <hkxhk>     | 0     | -       | [hh+hk+h-:kk]  | 3:1   |
| 70  | EQ185-600   | <nnxnp>     | 0.03  | -       | [nn:np]        | 1:1   |
| 71  | EQ190-1000a | <lmxll>     | 1.68  | -       | [ll:lm]        | 1:1   |
| 72  | EQ190-1000b | <hkxhk>     | 0.32  | -       | [hh+hk+h-:kk]  | 3:1   |
| 73  | EQ190-1000c | <nnxnp>     | 0.42  | -       | [nn:np]        | 1:1   |
| 74  | EQ190-1500  | <nnxnp>     | 0.03  | -       | [nn:np]        | 1:1   |
| 75  | EQ193-1000  | <nnxnp>     | 2.13  | -       | [nn:np]        | 1:1   |
| 76  | EQ193-600   | <nnxnp>     | 0.03  | -       | [nn:np]        | 1:1   |
| 77  | EQ199-180a  | <nnxnp>     | 2.63  | -       | [nn:np]        | 1:1   |
| 78  | EQ199-180b  | <hkxhk>     | 0.04  | -       | [hh+hk+h-:kk]  | 3:1   |
| 79  | EQ199-180c  | <lmxll>     | 0.03  | -       | [ll:lm]        | 1:1   |
| 80  | EQ199-800   | <nnxnp>     | 1.68  | -       | [nn:np]        | 1:1   |
| 81  | EQ201-250a  | <lmxll>     | 0.66  | -       | [ll:lm]        | 1:1   |
| 82  | EQ201-250b  | <nnxnp>     | 91.61 | *****   | [nn:np]        | 1:1   |
| 83  | EQ201-250c  | <lmxll>     | 0.42  | -       | [ll:lm]        | 1:1   |
| 84  | EQ214-400   | <nnxnp>     | 0.11  | -       | [nn:np]        | 1:1   |
| 85  | EQ249-500   | <lmxll>     | 2.63  | -       | [ll:lm]        | 1:1   |

| No. | Locus       | Segregation | X2    | Signif. | Classification | ratio |
|-----|-------------|-------------|-------|---------|----------------|-------|
| 86  | EQ254-250   | <lmxll>     | 0.11  | -       | [ll:lm]        | 1:1   |
| 87  | EQ254-500   | <lmxll>     | 0.42  | -       | [ll:lm]        | 1:1   |
| 88  | EQ260-210a  | <hkxhk>     | 0.88  | -       | [hh+hk+h-:kk]  | 3:1   |
| 89  | EQ260-210b  | <lmxll>     | 2.63  | -       | [ll:lm]        | 1:1   |
| 90  | EQ260-210c  | <nnxnp>     | 0.42  | -       | [nn:np]        | 1:1   |
| 91  | EQ265-280   | <nnxnp>     | 1.29  | -       | [nn:np]        | 1:1   |
| 92  | EQ284-2000  | <nnxnp>     | 0.03  | -       | [nn:np]        | 1:1   |
| 93  | EQ286-200a  | <hkxhk>     | 0.14  | -       | [hh+hk+h-:kk]  | 3:1   |
| 94  | EQ286-200b  | <lmxll>     | 0.95  | -       | [ll:lm]        | 1:1   |
| 95  | EQ287-120a  | <lmxll>     | 0     | -       | [ll:lm]        | 1:1   |
| 96  | EQ287-120b  | <hkxhk>     | 16.98 | *****   | [hh+hk+h-:kk]  | 3:1   |
| 97  | EQ291-200a  | <hkxhk>     | 0.04  | -       | [hh+hk+h-:kk]  | 3:1   |
| 98  | EQ291-200b  | <nnxnp>     | 0.11  | -       | [nn:np]        | 1:1   |
| 99  | EQ291-200c  | <lmxll>     | 0.95  | -       | [ll:lm]        | 1:1   |
| 100 | EQ298-200   | <nnxnp>     | 1.68  | -       | [nn:np]        | 1:1   |
| 101 | EQ298-300a  | <nnxnp>     | 0.42  | -       | [nn:np]        | 1:1   |
| 102 | EQ298-300b  | <nnxnp>     | 0.24  | -       | [nn:np]        | 1:1   |
| 103 | EQ299-300a  | <lmxll>     | 2.13  | -       | [ll:lm]        | 1:1   |
| 104 | EQ299-300b  | <lmxll>     | 0.95  | -       | [ll:lm]        | 1:1   |
| 105 | EQ299-600   | <lmxll>     | 2.13  | -       | [ll:lm]        | 1:1   |
| 106 | EQ304-250   | <hkxhk>     | 0     | -       | [hh+hk+h-:kk]  | 3:1   |
| 107 | EQ308-280   | <nnxnp>     | 0.03  | -       | [nn:np]        | 1:1   |
| 108 | EQ315-1000  | <nnxnp>     | 2.13  | -       | [nn:np]        | 1:1   |
| 109 | EQ315-2000  | <nnxnp>     | 0.95  | -       | [nn:np]        | 1:1   |
| 110 | EQ321-200   | <lmxll>     | 0.66  | -       | [ll:lm]        | 1:1   |
| 111 | EQ321-250   | <lmxll>     | 0.24  | -       | [ll:lm]        | 1:1   |
| 112 | EQ324-100   | <nnxnp>     | 0.66  | -       | [nn:np]        | 1:1   |
| 113 | EQ330-150   | <lmxll>     | 3.79  | *       | [ll:lm]        | 1:1   |
| 114 | EQ330-175   | <hkxhk>     | 0.88  | -       | [hh+hk+h-:kk]  | 3:1   |
| 115 | EQ330-180   | <lmxll>     | 1.68  | -       | [ll:lm]        | 1:1   |
| 116 | EQ330-200   | <lmxll>     | 0.42  | -       | [ll:lm]        | 1:1   |
| 117 | EQ340-250   | <nnxnp>     | 2.13  | -       | [nn:np]        | 1:1   |
| 118 | EQ341-200   | <lmxll>     | 0.42  | -       | [ll:lm]        | 1:1   |
| 119 | EQ34-230    | <nnxnp>     | 0.11  | -       | [nn:np]        | 1:1   |
| 120 | EQ354-2000  | <lmxll>     | 0.24  | -       | [ll:lm]        | 1:1   |
| 121 | EQ375-200   | <lmxll>     | 0.11  | -       | [ll:lm]        | 1:1   |
| 122 | EQ380-220a  | <lmxll>     | 0.95  | -       | [ll:lm]        | 1:1   |
| 123 | EQ380-220b  | <hkxhk>     | 0.04  | -       | [hh+hk+h-:kk]  | 3:1   |
| 124 | EQ380-220c  | <nnxnp>     | 3.79  | *       | [nn:np]        | 1:1   |
| 125 | EQ389-100   | <lmxll>     | 0.11  | -       | [ll:lm]        | 1:1   |
| 126 | EQ389-200a  | <lmxll>     | 0.95  | -       | [ll:lm]        | 1:1   |
| 127 | EQ389-200b  | <lmxll>     | 0.42  | -       | [ll:lm]        | 1:1   |
| 128 | EQ391-1050a | <nnxnp>     | 2.13  | -       | [nn:np]        | 1:1   |

| No. | Locus       | Segregation | X2   | Signif. | Classification | ratio |
|-----|-------------|-------------|------|---------|----------------|-------|
| 129 | EQ391-1050b | <hkxhk>     | 0.04 | -       | [hh+hk+h-:kk]  | 3:1   |
| 130 | EQ391-1050c | <lmxll>     | 0.95 | -       | [ll:lm]        | 1:1   |
| 131 | EQ391-1200  | <nnxnp>     | 2.13 | -       | [nn:np]        | 1:1   |
| 132 | EQ398-250a  | <nnxnp>     | 0.42 | -       | [nn:np]        | 1:1   |
| 133 | EQ398-250b  | <lmxll>     | 2.63 | -       | [ll:lm]        | 1:1   |
| 134 | EQ416-190a  | <lmxll>     | 2.13 | -       | [ll:lm]        | 1:1   |
| 135 | EQ416-190b  | <nnxnp>     | 0.24 | -       | [nn:np]        | 1:1   |
| 136 | EQ416-210a  | <lmxll>     | 1.68 | -       | [ll:lm]        | 1:1   |
| 137 | EQ416-210b  | <lmxll>     | 0.42 | -       | [ll:lm]        | 1:1   |
| 138 | EQ417-300a  | <lmxll>     | 0.66 | -       | [ll:lm]        | 1:1   |
| 139 | EQ417-300b  | <lmxll>     | 0.03 | -       | [ll:lm]        | 1:1   |
| 140 | EQ425-4000  | <nnxnp>     | 0.95 | -       | [nn:np]        | 1:1   |
| 141 | EQ425-5000  | <nnxnp>     | 0.24 | -       | [nn:np]        | 1:1   |
| 142 | EQ431-150a  | <hkxhk>     | 0    | -       | [hh+hk+h-:kk]  | 3:1   |
| 143 | EQ431-150b  | <lmxll>     | 0.11 | -       | [ll:lm]        | 1:1   |
| 144 | EQ431-150c  | <nnxnp>     | 0.66 | -       | [nn:np]        | 1:1   |
| 145 | EQ436-250   | <nnxnp>     | 1.29 | -       | [nn:np]        | 1:1   |
| 146 | EQ457-200a  | <hkxhk>     | 0.88 | -       | [hh+hk+h-:kk]  | 3:1   |
| 147 | EQ457-200b  | <lmxll>     | 0.42 | -       | [ll:lm]        | 1:1   |
| 148 | EQ458-175   | <nnxnp>     | 1.68 | -       | [nn:np]        | 1:1   |
| 149 | EQ466-100a  | <nnxnp>     | 3.79 | *       | [nn:np]        | 1:1   |
| 150 | EQ466-100b  | <hkxhk>     | 1.26 | -       | [hh+hk+h-:kk]  | 3:1   |
| 151 | EQ466-100c  | <lmxll>     | 1.29 | -       | [ll:lm]        | 1:1   |
| 152 | EQ475-250   | <nnxnp>     | 0.95 | -       | [nn:np]        | 1:1   |
| 153 | EQ489-150a  | <lmxll>     | 2.13 | -       | [ll:lm]        | 1:1   |
| 154 | EQ489-150b  | <hkxhk>     | 0.56 | -       | [hh+hk+h-:kk]  | 3:1   |
| 155 | EQ490-200   | <lmxll>     | 0.03 | -       | [ll:lm]        | 1:1   |
| 156 | EQ494-200a  | <lmxll>     | 0.24 | -       | [ll:lm]        | 1:1   |
| 157 | EQ494-200b  | <hkxhk>     | 1.26 | -       | [hh+hk+h-:kk]  | 3:1   |
| 158 | EQ494-200c  | <nnxnp>     | 2.13 | -       | [nn:np]        | 1:1   |
| 159 | EQ501-200a  | <hkxhk>     | 0    | -       | [hh+hk+h-:kk]  | 3:1   |
| 160 | EQ501-200b  | <hkxhk>     | 0.56 | -       | [hh+hk+h-:kk]  | 3:1   |
| 161 | EQ522-260   | <nnxnp>     | 1.29 | -       | [nn:np]        | 1:1   |
| 162 | EQ531-210   | <nnxnp>     | 0.95 | -       | [nn:np]        | 1:1   |
| 163 | EQ535-150a  | <nnxnp>     | 0.95 | -       | [nn:np]        | 1:1   |
| 164 | EQ535-150c  | <nnxnp>     | 0.42 | -       | [nn:np]        | 1:1   |
| 165 | EQ538-160b  | <nnxnp>     | 0.11 | -       | [nn:np]        | 1:1   |
| 166 | EQ640-280b  | <nnxnp>     | 0.24 | -       | [nn:np]        | 1:1   |
| 167 | EQ640-280c  | <nnxnp>     | 0.66 | -       | [nn:np]        | 1:1   |
| 168 | EQ661-170   | <nnxnp>     | 0.95 | -       | [nn:np]        | 1:1   |
| 169 | EQ681-260   | <nnxnp>     | 0.95 | -       | [nn:np]        | 1:1   |
| 170 | EQ687-150   | <nnxnp>     | 0.42 | -       | [nn:np]        | 1:1   |
| 171 | EQ709-100   | <nnxnp>     | 0.66 | -       | [nn:np]        | 1:1   |

| No. | Locus       | Segregation | X2   | Signif. | Classification | ratio |
|-----|-------------|-------------|------|---------|----------------|-------|
| 172 | EQ731-180c  | <nnxnp>     | 1.68 | -       | [nn:np]        | 1:1   |
| 173 | EQ773-280   | <nnxnp>     | 1.68 | -       | [nn:np]        | 1:1   |
| 174 | EQ788-150   | <nnxnp>     | 1.29 | -       | [nn:np]        | 1:1   |
| 175 | EQ855-250c  | <nnxnp>     | 0.95 | -       | [nn:np]        | 1:1   |
| 176 | EQ873-130   | <nnxnp>     | 0.42 | -       | [nn:np]        | 1:1   |
| 177 | EQ904-240   | <nnxnp>     | 2.13 | -       | [nn:np]        | 1:1   |
| 178 | EQ905-180a  | <nnxnp>     | 2.13 | -       | [nn:np]        | 1:1   |
| 179 | EQ912-200   | <nnxnp>     | 0.11 | -       | [nn:np]        | 1:1   |
| 180 | EQ946-190   | <nnxnp>     | 0.11 | -       | [nn:np]        | 1:1   |
| 181 | EQ947-100   | <nnxnp>     | 2.13 | -       | [nn:np]        | 1:1   |
| 182 | EQ954-300   | <nnxnp>     | 1.29 | -       | [nn:np]        | 1:1   |
| 183 | EQ956-250a  | <nnxnp>     | 1.68 | -       | [nn:np]        | 1:1   |
| 184 | EQ956-250c  | <nnxnp>     | 1.68 | -       | [nn:np]        | 1:1   |
| 185 | EQ957-330b  | <nnxnp>     | 1.68 | -       | [nn:np]        | 1:1   |
| 186 | EQ962-250   | <nnxnp>     | 1.68 | -       | [nn:np]        | 1:1   |
| 187 | EQ1025-170  | <nnxnp>     | 0.24 | -       | [nn:np]        | 1:1   |
| 188 | EQ1042-170  | <nnxnp>     | 0    | -       | [nn:np]        | 1:1   |
| 189 | EQ1043-150  | <nnxnp>     | 2.13 | -       | [nn:np]        | 1:1   |
| 190 | EQ1072-250a | <nnxnp>     | 0.66 | -       | [nn:np]        | 1:1   |
| 191 | EQ1093-220b | <nnxnp>     | 1.68 | -       | [nn:np]        | 1:1   |
| 192 | EQ1093-180b | <nnxnp>     | 1.68 | -       | [nn:np]        | 1:1   |
| 193 | EQ1107-110a | <nnxnp>     | 2.13 | -       | [nn:np]        | 1:1   |
| 194 | EQ1122-120a | <nnxnp>     | 2.13 | -       | [nn:np]        | 1:1   |
| 195 | EQ1178-130  | <nnxnp>     | 0.66 | -       | [nn:np]        | 1:1   |
| 196 | EQ1191-300c | <nnxnp>     | 1.68 | -       | [nn:np]        | 1:1   |
| 197 | EQ1202-390c | <nnxnp>     | 0.95 | -       | [nn:np]        | 1:1   |
| 198 | EQ1235-160  | <nnxnp>     | 0.11 | -       | [nn:np]        | 1:1   |
| 199 | EQ1252-100  | <nnxnp>     | 0.66 | -       | [nn:np]        | 1:1   |
| 200 | EQ1256-100  | <nnxnp>     | 0.66 | -       | [nn:np]        | 1:1   |
| 201 | EQ1272-200  | <nnxnp>     | 1.29 | -       | [nn:np]        | 1:1   |
| 202 | EQ1291-280  | <nnxnp>     | 0.95 | -       | [nn:np]        | 1:1   |
| 203 | EQ1291-230a | <nnxnp>     | 0.11 | -       | [nn:np]        | 1:1   |
| 204 | EQ1291-230b | <nnxnp>     | 2.13 | -       | [nn:np]        | 1:1   |
| 205 | EQ1350-270a | <nnxnp>     | 1.68 | -       | [nn:np]        | 1:1   |
| 206 | EQ1383-240a | <nnxnp>     | 1.29 | -       | [nn:np]        | 1:1   |
| 207 | EQ1390-400  | <nnxnp>     | 1.68 | -       | [nn:np]        | 1:1   |
| 208 | EQ1407-280  | <nnxnp>     | 0.03 | -       | [nn:np]        | 1:1   |
| 209 | EQ1425-370b | <nnxnp>     | 0.95 | -       | [nn:np]        | 1:1   |
| 210 | EQ1453-250  | <nnxnp>     | 0.95 | -       | [nn:np]        | 1:1   |
| 211 | EQ1461-205  | <nnxnp>     | 0.95 | -       | [nn:np]        | 1:1   |
| 212 | EQ1482-230  | <nnxnp>     | 2.13 | -       | [nn:np]        | 1:1   |
| 213 | EQ1483-210  | <nnxnp>     | 0.66 | -       | [nn:np]        | 1:1   |
| 214 | EQ1508-170  | <nnxnp>     | 0.42 | -       | [nn:np]        | 1:1   |

| No. | Locus       | Segregation | X2    | Signif. | Classification | ratio |
|-----|-------------|-------------|-------|---------|----------------|-------|
| 215 | EQ1524-140a | <nnxnp>     | 0.03  | -       | [nn:np]        | 1:1   |
| 216 | EQ1590-160  | <nnxnp>     | 1.29  | -       | [nn:np]        | 1:1   |
| 217 | EQ1593-240  | <nnxnp>     | 0.66  | -       | [nn:np]        | 1:1   |
| 218 | EQ1600-250c | <nnxnp>     | 0.95  | -       | [nn:np]        | 1:1   |
| 219 | EQ1628-200  | <nnxnp>     | 3.18  | *       | [nn:np]        | 1:1   |
| 220 | EQ1652-190b | <nnxnp>     | 0.42  | -       | [nn:np]        | 1:1   |
| 221 | EQ1666-150  | <nnxnp>     | 0.42  | -       | [nn:np]        | 1:1   |
| 222 | EQ1690-250a | <nnxnp>     | 0.95  | -       | [nn:np]        | 1:1   |
| 223 | EQ1690-250b | <nnxnp>     | 5.92  | **      | [nn:np]        | 1:1   |
| 224 | EQ1690-230  | <nnxnp>     | 0.03  | -       | [nn:np]        | 1:1   |
| 225 | EQ1690-215  | <nnxnp>     | 0.11  | -       | [nn:np]        | 1:1   |
| 226 | EQ1745-160a | <nnxnp>     | 1.29  | -       | [nn:np]        | 1:1   |
| 227 | EQ1748-130  | <nnxnp>     | 97.92 | *****   | [nn:np]        | 1:1   |
| 228 | EQ1748-120b | <nnxnp>     | 5.92  | **      | [nn:np]        | 1:1   |
| 229 | EQ1767-250  | <nnxnp>     | 5.16  | **      | [nn:np]        | 1:1   |
| 230 | EQ1795-250  | <nnxnp>     | 10.53 | ****    | [nn:np]        | 1:1   |
| 231 | EQ1796-200a | <nnxnp>     | 0.66  | -       | [nn:np]        | 1:1   |
| 232 | EQ1812-215  | <nnxnp>     | 0.11  | -       | [nn:np]        | 1:1   |
| 233 | EQ1816-250  | <nnxnp>     | 3.79  | *       | [nn:np]        | 1:1   |
| 234 | EQ1821-250a | <nnxnp>     | 3.79  | *       | [nn:np]        | 1:1   |
| 235 | EQ1829-290  | <nnxnp>     | 0.42  | -       | [nn:np]        | 1:1   |
| 236 | EQ1833-165  | <nnxnp>     | 6.74  | ***     | [nn:np]        | 1:1   |
| 237 | EQ1850-275  | <nnxnp>     | 0.11  | -       | [nn:np]        | 1:1   |
| 238 | EQ1861-250  | <nnxnp>     | 0.42  | -       | [nn:np]        | 1:1   |
| 239 | EQ1870-280  | <nnxnp>     | 1.29  | -       | [nn:np]        | 1:1   |
| 240 | EQ1889-145a | <nnxnp>     | 5.92  | **      | [nn:np]        | 1:1   |
| 241 | EQ1889-130  | <nnxnp>     | 3.79  | *       | [nn:np]        | 1:1   |
| 242 | EQ1898-200  | <nnxnp>     | 5.16  | **      | [nn:np]        | 1:1   |
| 243 | EQ1948-180  | <nnxnp>     | 11.61 | *****   | [nn:np]        | 1:1   |
| 244 | EQ1989-200a | <nnxnp>     | 1.29  | -       | [nn:np]        | 1:1   |
| 245 | EQ2058-180b | <nnxnp>     | 0.95  | -       | [nn:np]        | 1:1   |
| 246 | EQ2067-215  | <nnxnp>     | 0.24  | -       | [nn:np]        | 1:1   |
| 247 | EQ2089-170  | <nnxnp>     | 1.68  | -       | [nn:np]        | 1:1   |
| 248 | EQ2095-220  | <nnxnp>     | 1.29  | -       | [nn:np]        | 1:1   |
| 249 | EQ2096-170  | <nnxnp>     | 1.68  | -       | [nn:np]        | 1:1   |
| 250 | EQ2099-230  | <nnxnp>     | 1.29  | -       | [nn:np]        | 1:1   |
| 251 | EQ2099-220  | <nnxnp>     | 0.24  | -       | [nn:np]        | 1:1   |
| 252 | EQ2122-215c | <nnxnp>     | 1.29  | -       | [nn:np]        | 1:1   |
| 253 | EQ2129-270c | <nnxnp>     | 0.42  | -       | [nn:np]        | 1:1   |
| 254 | EQ2143-280a | <nnxnp>     | 0.24  | -       | [nn:np]        | 1:1   |
| 255 | EQ2152-150  | <nnxnp>     | 1.68  | -       | [nn:np]        | 1:1   |
| 256 | EQ2155-275  | <nnxnp>     | 2.13  | -       | [nn:np]        | 1:1   |
| 257 | EQ2158-250  | <nnxnp>     | 0.66  | -       | [nn:np]        | 1:1   |

| No. | Locus       | Segregation | X2   | Signif. | Classification | ratio |
|-----|-------------|-------------|------|---------|----------------|-------|
| 258 | EQ2160-250  | <nnxnp>     | 1.68 | -       | [nn:np]        | 1:1   |
| 259 | EQ2190-150  | <nnxnp>     | 1.29 | -       | [nn:np]        | 1:1   |
| 260 | EQ530-220   | <lmxll>     | 0.66 | -       | [ll:lm]        | 1:1   |
| 261 | EQ535-150b  | <lmxll>     | 2.13 | -       | [ll:lm]        | 1:1   |
| 262 | EQ538-160c  | <lmxll>     | 2.13 | -       | [ll:lm]        | 1:1   |
| 263 | EQ549-250b  | <lmxll>     | 2.13 | -       | [ll:lm]        | 1:1   |
| 264 | EQ580-180a  | <lmxll>     | 0.03 | -       | [ll:lm]        | 1:1   |
| 265 | EQ583-210b  | <lmxll>     | 0.24 | -       | [ll:lm]        | 1:1   |
| 266 | EQ594-250   | <lmxll>     | 1.68 | -       | [ll:lm]        | 1:1   |
| 267 | EQ632-100   | <lmxll>     | 0.11 | -       | [ll:lm]        | 1:1   |
| 268 | EQ640-280a  | <lmxll>     | 0.66 | -       | [ll:lm]        | 1:1   |
| 269 | EQ640-280d  | <lmxll>     | 2.13 | -       | [ll:lm]        | 1:1   |
| 270 | EQ658-700a  | <lmxll>     | 0.11 | -       | [ll:lm]        | 1:1   |
| 271 | EQ708-250   | <lmxll>     | 2.13 | -       | [ll:lm]        | 1:1   |
| 272 | EQ731-180a  | <lmxll>     | 1.29 | -       | [ll:lm]        | 1:1   |
| 273 | EQ768-200   | <lmxll>     | 0    | -       | [ll:lm]        | 1:1   |
| 274 | EQ781-140   | <lmxll>     | 2.13 | -       | [ll:lm]        | 1:1   |
| 275 | EQ813-270b  | <lmxll>     | 2.13 | -       | [ll:lm]        | 1:1   |
| 276 | EQ813-270c  | <lmxll>     | 0.66 | -       | [ll:lm]        | 1:1   |
| 277 | EQ844-250a  | <lmxll>     | 2.13 | -       | [ll:lm]        | 1:1   |
| 278 | EQ846-600   | <lmxll>     | 0.11 | -       | [ll:lm]        | 1:1   |
| 279 | EQ855-250b  | <lmxll>     | 0.42 | -       | [ll:lm]        | 1:1   |
| 280 | EQ905-180c  | <lmxll>     | 1.29 | -       | [ll:lm]        | 1:1   |
| 281 | EQ957-330c  | <lmxll>     | 0.42 | -       | [ll:lm]        | 1:1   |
| 282 | EQ975-175   | <lmxll>     | 0.42 | -       | [ll:lm]        | 1:1   |
| 283 | EQ1107-110b | <lmxll>     | 0.24 | -       | [ll:lm]        | 1:1   |
| 284 | EQ1122-120c | <lmxll>     | 0.42 | -       | [ll:lm]        | 1:1   |
| 285 | EQ1151-180  | <lmxll>     | 0.66 | -       | [ll:lm]        | 1:1   |
| 286 | EQ1191-300b | <lmxll>     | 1.68 | -       | [ll:lm]        | 1:1   |
| 287 | EQ1214-250  | <lmxll>     | 2.13 | -       | [ll:lm]        | 1:1   |
| 288 | EQ1261-200a | <lmxll>     | 0.03 | -       | [ll:lm]        | 1:1   |
| 289 | EQ1281-200b | <lmxll>     | 0.11 | -       | [ll:lm]        | 1:1   |
| 290 | EQ1291-260  | <lmxll>     | 0.66 | -       | [ll:lm]        | 1:1   |
| 291 | EQ1291-250  | <lmxll>     | 0.24 | -       | [ll:lm]        | 1:1   |
| 292 | EQ1291-240  | <lmxll>     | 0.24 | -       | [ll:lm]        | 1:1   |
| 293 | EQ1298-110  | <lmxll>     | 1.29 | -       | [ll:lm]        | 1:1   |
| 294 | EQ1317-110a | <lmxll>     | 2.13 | -       | [ll:lm]        | 1:1   |
| 295 | EQ1317-110b | <lmxll>     | 0.95 | -       | [ll:lm]        | 1:1   |
| 296 | EQ1350-270b | <lmxll>     | 0.24 | -       | [ll:lm]        | 1:1   |
| 297 | EQ1376-150b | <lmxll>     | 0.24 | -       | [ll:lm]        | 1:1   |
| 298 | EQ1387-250a | <lmxll>     | 0.66 | -       | [ll:lm]        | 1:1   |
| 299 | EQ1425-370a | <lmxll>     | 0.95 | -       | [ll:lm]        | 1:1   |
| 300 | EQ1484-230  | <lmxll>     | 0.24 | -       | [ll:lm]        | 1:1   |

| No. | Locus       | Segregation | X2    | Signif. | Classification | ratio |
|-----|-------------|-------------|-------|---------|----------------|-------|
| 301 | EQ1583-200a | <lmxll>     | 0     | -       | [ll:lm]        | 1:1   |
| 302 | EQ1700-340  | <lmxll>     | 0.42  | -       | [ll:lm]        | 1:1   |
| 303 | EQ1633-200a | <lmxll>     | 0.11  | -       | [ll:lm]        | 1:1   |
| 304 | EQ1633-200c | <lmxll>     | 0.11  | -       | [ll:lm]        | 1:1   |
| 305 | EQ1651-200b | <lmxll>     | 0.24  | -       | [ll:lm]        | 1:1   |
| 306 | EQ1652-190a | <lmxll>     | 20.63 | *****   | [ll:lm]        | 1:1   |
| 307 | EQ1674-315  | <lmxll>     | 0.95  | -       | [ll:lm]        | 1:1   |
| 308 | EQ1706-195  | <lmxll>     | 5.92  | **      | [ll:lm]        | 1:1   |
| 309 | EQ1706-185  | <lmxll>     | 5.92  | **      | [ll:lm]        | 1:1   |
| 310 | EQ1723-120  | <lmxll>     | 0.03  | -       | [ll:lm]        | 1:1   |
| 311 | EQ1727-140b | <lmxll>     | 0.11  | -       | [ll:lm]        | 1:1   |
| 312 | EQ1735-210a | <lmxll>     | 2.13  | -       | [ll:lm]        | 1:1   |
| 313 | EQ1748-110  | <lmxll>     | 1.29  | -       | [ll:lm]        | 1:1   |
| 314 | EQ1751-130  | <lmxll>     | 4.45  | **      | [ll:lm]        | 1:1   |
| 315 | EQ1768-100b | <lmxll>     | 1.29  | -       | [ll:lm]        | 1:1   |
| 316 | EQ1771-250  | <lmxll>     | 1.68  | -       | [ll:lm]        | 1:1   |
| 317 | EQ1798-170  | <lmxll>     | 0.24  | -       | [ll:lm]        | 1:1   |
| 318 | EQ1819-150a | <lmxll>     | 5.92  | **      | [ll:lm]        | 1:1   |
| 319 | EQ1819-150b | <lmxll>     | 2.13  | -       | [ll:lm]        | 1:1   |
| 320 | EQ1820-200a | <lmxll>     | 2.13  | -       | [ll:lm]        | 1:1   |
| 321 | EQ1974-270  | <lmxll>     | 0.11  | -       | [ll:lm]        | 1:1   |
| 322 | EQ2033-280  | <lmxll>     | 2.13  | -       | [ll:lm]        | 1:1   |
| 323 | EQ2058-180a | <lmxll>     | 6.74  | ***     | [ll:lm]        | 1:1   |
| 324 | EQ2058-180c | <lmxll>     | 0.11  | -       | [ll:lm]        | 1:1   |
| 325 | EQ2075-270  | <lmxll>     | 0.11  | -       | [ll:lm]        | 1:1   |
| 326 | EQ2084-220  | <lmxll>     | 0.95  | -       | [ll:lm]        | 1:1   |
| 327 | EQ2122-215a | <lmxll>     | 0.95  | -       | [ll:lm]        | 1:1   |
| 328 | EQ2127-120  | <lmxll>     | 1.68  | -       | [ll:lm]        | 1:1   |
| 329 | EQ2129-270b | <lmxll>     | 2.13  | -       | [ll:lm]        | 1:1   |
| 330 | EQ2146-280  | <lmxll>     | 1.29  | -       | [ll:lm]        | 1:1   |
| 331 | EQ2160-210  | <lmxll>     | 1.29  | -       | [ll:lm]        | 1:1   |
| 332 | EQ2168-130  | <lmxll>     | 0.03  | -       | [ll:lm]        | 1:1   |
| 333 | EQ2178-200  | <lmxll>     | 0.24  | -       | [ll:lm]        | 1:1   |
| 334 | EQ517-175   | <hkxhk>     | 0.56  | -       | [hh+hk+h-:kk]  | 3:1   |
| 335 | EQ538-160a  | <hkxhk>     | 0.14  | -       | [hh+hk+h-:kk]  | 3:1   |
| 336 | EQ576-280c  | <hkxhk>     | 0.14  | -       | [hh+hk+h-:kk]  | 3:1   |
| 337 | EQ658-700b  | <hkxhk>     | 0.32  | -       | [hh+hk+h-:kk]  | 3:1   |
| 338 | EQ822-250   | <hkxhk>     | 0.88  | -       | [hh+hk+h-:kk]  | 3:1   |
| 339 | EQ854-280c  | <hkxhk>     | 0.56  | -       | [hh+hk+h-:kk]  | 3:1   |
| 340 | EQ855-250a  | <hkxhk>     | 0.56  | -       | [hh+hk+h-:kk]  | 3:1   |
| 341 | EQ1051-190  | <hkxhk>     | 0.56  | -       | [hh+hk+h-:kk]  | 3:1   |
| 342 | EQ1055-135  | <hkxhk>     | 0.88  | -       | [hh+hk+h-:kk]  | 3:1   |
| 343 | EQ1072-250b | <hkxhk>     | 0.04  | -       | [hh+hk+h-:kk]  | 3:1   |



| No. | Locus       | Segregation | X2    | Signif. | Classification | ratio |
|-----|-------------|-------------|-------|---------|----------------|-------|
| 344 | EQ1122-120b | <hkxhk>     | 1.72  | -       | [hh+hk+h-:kk]  | 3:1   |
| 345 | EQ1122-120d | <hkxhk>     | 0.14  | -       | [hh+hk+h-:kk]  | 3:1   |
| 346 | EQ1202-390b | <hkxhk>     | 0.88  | -       | [hh+hk+h-:kk]  | 3:1   |
| 347 | EQ1281-200c | <hkxhk>     | 0.04  | -       | [hh+hk+h-:kk]  | 3:1   |
| 348 | EQ1333-180  | <hkxhk>     | 0     | -       | [hh+hk+h-:kk]  | 3:1   |
| 349 | EQ1372-190  | <hkxhk>     | 0.04  | -       | [hh+hk+h-:kk]  | 3:1   |
| 350 | EQ1376-150a | <hkxhk>     | 0.56  | -       | [hh+hk+h-:kk]  | 3:1   |
| 351 | EQ1425-360  | <hkxhk>     | 0.32  | -       | [hh+hk+h-:kk]  | 3:1   |
| 352 | EQ1425-320  | <hkxhk>     | 0.88  | -       | [hh+hk+h-:kk]  | 3:1   |
| 353 | EQ1524-140b | <hkxhk>     | 0.04  | -       | [hh+hk+h-:kk]  | 3:1   |
| 354 | EQ1525-140b | <hkxhk>     | 1.72  | -       | [hh+hk+h-:kk]  | 3:1   |
| 355 | EQ1600-250a | <hkxhk>     | 0.14  | -       | [hh+hk+h-:kk]  | 3:1   |
| 356 | EQ1615-800  | <hkxhk>     | 0.04  | -       | [hh+hk+h-:kk]  | 3:1   |
| 357 | EQ1806-190  | <hkxhk>     | 0.32  | -       | [hh+hk+h-:kk]  | 3:1   |
| 358 | EQ1817-250a | <hkxhk>     | 0.56  | -       | [hh+hk+h-:kk]  | 3:1   |
| 359 | EQ2084-230  | <hkxhk>     | 0.88  | -       | [hh+hk+h-:kk]  | 3:1   |
| 360 | EQ519-300   | <hkxhk>     | 0.32  | -       | [hh+hk+h-:kk]  | 3:1   |
| 361 | EQ519-290   | <hkxhk>     | 0.88  | -       | [hh+hk+h-:kk]  | 3:1   |
| 362 | EQ522-250   | <hkxhk>     | 1.72  | -       | [hh+hk+h-:kk]  | 3:1   |
| 363 | EQ530-210   | <hkxhk>     | 0.14  | -       | [hh+hk+h-:kk]  | 3:1   |
| 364 | EQ549-250a  | <hkxhk>     | 0     | -       | [hh+hk+h-:kk]  | 3:1   |
| 365 | EQ576-280a  | <hkxhk>     | 0.88  | -       | [hh+hk+h-:kk]  | 3:1   |
| 366 | EQ576-280b  | <hkxhk>     | 0.32  | -       | [hh+hk+h-:kk]  | 3:1   |
| 367 | EQ580-180b  | <hkxhk>     | 0.56  | -       | [hh+hk+h-:kk]  | 3:1   |
| 368 | EQ583-210a  | <hkxhk>     | 0.32  | -       | [hh+hk+h-:kk]  | 3:1   |
| 369 | EQ672-250   | <hkxhk>     | 0.56  | -       | [hh+hk+h-:kk]  | 3:1   |
| 370 | EQ702-170   | <hkxhk>     | 0.32  | -       | [hh+hk+h-:kk]  | 3:1   |
| 371 | EQ731-180b  | <hkxhk>     | 0.88  | -       | [hh+hk+h-:kk]  | 3:1   |
| 372 | EQ767-200a  | <hkxhk>     | 0.32  | -       | [hh+hk+h-:kk]  | 3:1   |
| 373 | EQ767-200b  | <hkxhk>     | 0.88  | -       | [hh+hk+h-:kk]  | 3:1   |
| 374 | EQ813-270a  | <hkxhk>     | 0.56  | -       | [hh+hk+h-:kk]  | 3:1   |
| 375 | EQ844-250b  | <hkxhk>     | 0.88  | -       | [hh+hk+h-:kk]  | 3:1   |
| 376 | EQ854-280a  | <hkxhk>     | 0.04  | -       | [hh+hk+h-:kk]  | 3:1   |
| 377 | EQ854-280b  | <hkxhk>     | 0.32  | -       | [hh+hk+h-:kk]  | 3:1   |
| 378 | EQ855-250d  | <hkxhk>     | 1.26  | -       | [hh+hk+h-:kk]  | 3:1   |
| 379 | EQ882-180   | <hkxhk>     | 0.56  | -       | [hh+hk+h-:kk]  | 3:1   |
| 380 | EQ905-180b  | <hkxhk>     | 1.26  | -       | [hh+hk+h-:kk]  | 3:1   |
| 381 | EQ956-250b  | <hkxhk>     | 38.21 | *****   | [hh+hk+h-:kk]  | 3:1   |
| 382 | EQ957-330a  | <hkxhk>     | 0     | -       | [hh+hk+h-:kk]  | 3:1   |
| 383 | EQ958-150a  | <hkxhk>     | 0.88  | -       | [hh+hk+h-:kk]  | 3:1   |
| 384 | EQ958-150b  | <hkxhk>     | 0.88  | -       | [hh+hk+h-:kk]  | 3:1   |
| 385 | EQ1093-220a | <hkxhk>     | 0.88  | -       | [hh+hk+h-:kk]  | 3:1   |
| 386 | EQ1093-180a | <hkxhk>     | 0.88  | -       | [hh+hk+h-:kk]  | 3:1   |

| No. | Locus       | Segregation | X2    | Signif. | Classification | ratio |
|-----|-------------|-------------|-------|---------|----------------|-------|
| 387 | EQ1191-300a | <hkxhk>     | 0.32  | -       | [hh+hk+h-:kk]  | 3:1   |
| 388 | EQ1202-390a | <hkxhk>     | 0.56  | -       | [hh+hk+h-:kk]  | 3:1   |
| 389 | EQ1205-220a | <hkxhk>     | 0.32  | -       | [hh+hk+h-:kk]  | 3:1   |
| 390 | EQ1205-220b | <hkxhk>     | 0     | -       | [hh+hk+h-:kk]  | 3:1   |
| 391 | EQ1261-200b | <hkxhk>     | 0.32  | -       | [hh+hk+h-:kk]  | 3:1   |
| 392 | EQ1263-120  | <hkxhk>     | 0.32  | -       | [hh+hk+h-:kk]  | 3:1   |
| 393 | EQ1281-200a | <hkxhk>     | 0.14  | -       | [hh+hk+h-:kk]  | 3:1   |
| 394 | EQ1307-150a | <hkxhk>     | 0.32  | -       | [hh+hk+h-:kk]  | 3:1   |
| 395 | EQ1307-150b | <hkxhk>     | 0.56  | -       | [hh+hk+h-:kk]  | 3:1   |
| 396 | EQ1312-220  | <hkxhk>     | 0.32  | -       | [hh+hk+h-:kk]  | 3:1   |
| 397 | EQ1312-180  | <hkxhk>     | 0     | -       | [hh+hk+h-:kk]  | 3:1   |
| 398 | EQ1317-110c | <hkxhk>     | 0.32  | -       | [hh+hk+h-:kk]  | 3:1   |
| 399 | EQ1350-250  | <hkxhk>     | 0.04  | -       | [hh+hk+h-:kk]  | 3:1   |
| 400 | EQ1376-150c | <hkxhk>     | 0.14  | -       | [hh+hk+h-:kk]  | 3:1   |
| 401 | EQ1383-240b | <hkxhk>     | 0.04  | -       | [hh+hk+h-:kk]  | 3:1   |
| 402 | EQ1387-250b | <hkxhk>     | 0.32  | -       | [hh+hk+h-:kk]  | 3:1   |
| 403 | EQ1524-140c | <hkxhk>     | 0.14  | -       | [hh+hk+h-:kk]  | 3:1   |
| 404 | EQ1525-140a | <hkxhk>     | 0.32  | -       | [hh+hk+h-:kk]  | 3:1   |
| 405 | EQ1583-200b | <hkxhk>     | 0.04  | -       | [hh+hk+h-:kk]  | 3:1   |
| 406 | EQ1590-170  | <hkxhk>     | 0.04  | -       | [hh+hk+h-:kk]  | 3:1   |
| 407 | EQ1591-265a | <hkxhk>     | 0.32  | -       | [hh+hk+h-:kk]  | 3:1   |
| 408 | EQ1591-265b | <hkxhk>     | 0.14  | -       | [hh+hk+h-:kk]  | 3:1   |
| 409 | EQ1598-240a | <hkxhk>     | 0.04  | -       | [hh+hk+h-:kk]  | 3:1   |
| 410 | EQ1598-240b | <hkxhk>     | 0.32  | -       | [hh+hk+h-:kk]  | 3:1   |
| 411 | EQ1600-250b | <hkxhk>     | 0.56  | -       | [hh+hk+h-:kk]  | 3:1   |
| 412 | EQ1633-200b | <hkxhk>     | 1.26  | -       | [hh+hk+h-:kk]  | 3:1   |
| 413 | EQ1636-250a | <hkxhk>     | 0.32  | -       | [hh+hk+h-:kk]  | 3:1   |
| 414 | EQ1636-250b | <hkxhk>     | 0.32  | -       | [hh+hk+h-:kk]  | 3:1   |
| 415 | EQ1651-200a | <hkxhk>     | 0.32  | -       | [hh+hk+h-:kk]  | 3:1   |
| 416 | EQ1727-140a | <hkxhk>     | 0.32  | -       | [hh+hk+h-:kk]  | 3:1   |
| 417 | EQ1735-210b | <hkxhk>     | 45.47 | *****   | [hh+hk+h-:kk]  | 3:1   |
| 418 | EQ1745-160b | <hkxhk>     | 0.88  | -       | [hh+hk+h-:kk]  | 3:1   |
| 419 | EQ1748-120a | <hkxhk>     | 0.32  | -       | [hh+hk+h-:kk]  | 3:1   |
| 420 | EQ1768-100a | <hkxhk>     | 0.14  | -       | [hh+hk+h-:kk]  | 3:1   |
| 421 | EQ1796-200b | <hkxhk>     | 0.56  | -       | [hh+hk+h-:kk]  | 3:1   |
| 422 | EQ1817-250b | <hkxhk>     | 0.56  | -       | [hh+hk+h-:kk]  | 3:1   |
| 423 | EQ1817-250c | <hkxhk>     | 0.88  | -       | [hh+hk+h-:kk]  | 3:1   |
| 424 | EQ1819-150c | <hkxhk>     | 0.32  | -       | [hh+hk+h-:kk]  | 3:1   |
| 425 | EQ1820-200b | <hkxhk>     | 0.56  | -       | [hh+hk+h-:kk]  | 3:1   |
| 426 | EQ1821-250b | <hkxhk>     | 0.32  | -       | [hh+hk+h-:kk]  | 3:1   |
| 427 | EQ1824-140  | <hkxhk>     | 0.88  | -       | [hh+hk+h-:kk]  | 3:1   |
| 428 | EQ1870-275  | <hkxhk>     | 0.14  | -       | [hh+hk+h-:kk]  | 3:1   |
| 429 | EQ1897-240  | <hkxhk>     | 0.14  | -       | [hh+hk+h-:kk]  | 3:1   |

| No. | Locus       | Segregation | X2    | Signif. | Classification | ratio |
|-----|-------------|-------------|-------|---------|----------------|-------|
| 430 | EQ1897-225  | <hkxhk>     | 0.56  | -       | [hh+hk+h-:kk]  | 3:1   |
| 431 | EQ1889-145b | <hkxhk>     | 1.26  | -       | [hh+hk+h-:kk]  | 3:1   |
| 432 | EQ1898-190  | <hkxhk>     | 0.56  | -       | [hh+hk+h-:kk]  | 3:1   |
| 433 | EQ1902-130a | <hkxhk>     | 0.88  | -       | [hh+hk+h-:kk]  | 3:1   |
| 434 | EQ1902-130b | <hkxhk>     | 0.56  | -       | [hh+hk+h-:kk]  | 3:1   |
| 435 | EQ1970-175a | <hkxhk>     | 0.56  | -       | [hh+hk+h-:kk]  | 3:1   |
| 436 | EQ1970-175b | <hkxhk>     | 0.88  | -       | [hh+hk+h-:kk]  | 3:1   |
| 437 | EQ1979-190  | <hkxhk>     | 0.56  | -       | [hh+hk+h-:kk]  | 3:1   |
| 438 | EQ1979-180  | <hkxhk>     | 0     | -       | [hh+hk+h-:kk]  | 3:1   |
| 439 | EQ1989-200b | <hkxhk>     | 0.88  | -       | [hh+hk+h-:kk]  | 3:1   |
| 440 | EQ1989-200c | <hkxhk>     | 48.04 | *****   | [hh+hk+h-:kk]  | 3:1   |
| 441 | EQ2033-300  | <hkxhk>     | 0.88  | -       | [hh+hk+h-:kk]  | 3:1   |
| 442 | EQ2079-140  | <hkxhk>     | 0.32  | -       | [hh+hk+h-:kk]  | 3:1   |
| 443 | EQ2084-210  | <hkxhk>     | 0.04  | -       | [hh+hk+h-:kk]  | 3:1   |
| 444 | EQ2122-215b | <hkxhk>     | 0.14  | -       | [hh+hk+h-:kk]  | 3:1   |
| 445 | EQ2127-145  | <hkxhk>     | 0.32  | -       | [hh+hk+h-:kk]  | 3:1   |
| 446 | EQ2129-270a | <hkxhk>     | 0.14  | -       | [hh+hk+h-:kk]  | 3:1   |
| 447 | EQ2143-280b | <hkxhk>     | 0.88  | -       | [hh+hk+h-:kk]  | 3:1   |
| 448 | EQ2147-180a | <hkxhk>     | 0.32  | -       | [hh+hk+h-:kk]  | 3:1   |
| 449 | EQ2147-180b | <hkxhk>     | 0.56  | -       | [hh+hk+h-:kk]  | 3:1   |
| 450 | EQ2160-230  | <hkxhk>     | 1.26  | -       | [hh+hk+h-:kk]  | 3:1   |
| 451 | GEU026-170  | <nnxnp>     | 11.75 | *****   | [nn:np]        | 1:1   |
| 452 | GEU026-180  | <nnxnp>     | 13.52 | *****   | [nn:np]        | 1:1   |

Note: Locus names consist of primer name and amplified fragment size. Results of Chi-squared test are given by the p values: \*  $p \leq 0.1$ , \*\*  $p \leq 0.05$ , \*\*\*  $p \leq 0.01$ , \*\*\*\*  $p \leq 0.005$ , \*\*\*\*\*  $p \leq 0.001$ , \*\*\*\*\*  $p \leq 0.0005$ , \*\*\*\*\*  $p \leq 0.0001$ . Classification of F1: [ll:lm] present in the female parent only, segregating 1:1 (ll:lm) in the progenies; [nn:np] present in the male parent only, segregating 1:1 (nn:np) in the progenies; [hh+hk+h-:kk], heterozygous in both parents, segregating 3:1 (hh+hk+h-:kk) in the progenies.
