# Supplementary material
Source: MDPI journal article supplement (https://www.mdpi.com/1999-4907/11/3/311)
Supplement: s1 [file s1]

**Table S1.** Primer sequence of SSR markers.

| Marker | Forward primer (5'→3') | Reverse primer (5'→3')       |
|--------|------------------------|------------------------------|
| EQ-9   | AGATTCCAGGTAGGAGCCGT   | ATCAAACACGTGGAATGGGT         |
| EQ-25  | TAGGATCCACGCAATAAGGG   | CACTACCTTGCCGCTTTTTTC        |
| EQ-26  | CAAATCTCCTTTGGCCGATA   | TCCTTTCCCATCTGTCATCC         |
| EQ-28  | ACATCTGAAGCAGTCCCCAC   | GTCGTTCTCGTGGATTTGGT         |
| EQ-31  | TCCAATCCGGTTCTTCATTC   | TAGCGGCACATGAACTACG          |
| EQ-33  | GCAACAGTCCAAGCAACCTT   | TCCCTTTAAACACACCCAACA        |
| EQ-34  | AATTCGTTTCCACTCATCGC   | TATTCGCATTCACTGTTCCG         |
| EQ-35  | TTGGGAAGAGGGTATCGTTG   | CAATCCCCTCTGATTAGCCA         |
| EQ-45  | TAATGCCTGGTTTACGCGAT   | TCCAGACGACGAAGTTGTTG         |
| EQ-61  | AACAAGGGCACTTTTCGTCAA  | CAAGCAAAATAAAAAGGGAGTACG     |
| EQ-62  | CCTCCACCTTTCCTCTCTCT   | ATGTTGCAATACAAACGCCA         |
| EQ-82  | TGCGACTATCGTTGAAAGCA   | TCTTTCCAAATAAAAAGAAAAATAGAGA |
| EQ-85  | AAGAGCGCCAGTATGGGTAA   | CCTCTTCAGTCCATGGGGTA         |
| EQ-94  | AAACATCAGGGAGAGAGCGA   | CCAAAGGGAGGAGAGCGTAT         |
| EQ-95  | TAGTGTCCCTTTGCCACCTCC  | GCCCTTCTCTCCACCAATTT         |
| EQ-97  | GGGAGTGGATATGGGGAGTT   | CATGGTATCTAATGGGTTGCG        |
| EQ-98  | TGCCGGATGCATAATGTTTA   | TCAGAGGACATGAATTGGCA         |
| EQ-105 | GTGACAGTCAGTTGAGGGC    | ATCGGCAAATACCCACATA          |
| EQ-118 | CATTCTGGTTGATGCTCCTG   | CGAGTGCCACCTTAATCTCG         |
| EQ-119 | GATTGTCCCGAACC AAAGAA  | AATCTTGGACGATCCATTGC         |
| EQ-120 | CTTGCTGGTGGGTCAGGTT    | TTTTGAACAGCAAATGAGCG         |
| EQ-125 | GGAAGCAAAGCAACTATGGG   | CAACACAAGCTCCAAAACGA         |
| EQ-137 | GATGGACTTTTGGGTGATGG   | AAGAACAATGGGAACAACCG         |
| EQ-139 | CACGCCACTATCACATGGAC   | TCAAGCATTGATTACAGCAGC        |
| EQ-144 | CAGCTTGGATGTGGATGTTG   | CCTAAATTGAGAATTATATTTTCATCC  |
| EQ-149 | CGGCGAAATTGGTTAGAAAA   | CCAAATCCAAATCCACCAAC         |
| EQ-156 | CTGATTGAACCCACCACCTT   | CGGGACGAGTGGTAAGAGAG         |
| EQ-172 | ACGCAAACAACACCATCATC   | AAGCGCCAAATTGATTGAAG         |
| EQ-179 | TGATCCAAATCCAACACTCG   | GGCTGATCAACTCGCTTCTC         |
| EQ-185 | AACCAGTTGGATGAAGCCAC   | GAAGCTCTCCCACAGCAATC         |
| EQ-190 | TGCTTTCAATCGTGGATGAC   | TGCCGAAACCACAATGACTA         |
| EQ-193 | TCCAAATTCGACAACAACCA   | AGCAAGGGAGAAAATAGGGG         |
| EQ-199 | ACTCCGGCGACTCTACTCAA   | AATCGAATAGGGCGTGTGTTG        |
| EQ-201 | CCACTGCCGGATTTAACAAT   | CTCGACCGTCTACCAAGTCC         |
| EQ-212 | ACAAGCATCCAAGAAATGGG   | CATGGATTCTGCAGCCACTA         |
| EQ-214 | GGCTTCTAATCACGAGCGTC   | CCAATCATCTTTTGCCACCT         |
| EQ-249 | CCTTCCCAGCACTTACATCC   | GCTTCGAAGGGAGAAATGGT         |
| EQ-253 | AGGTTTCTGGCGACAAAATG   | GAGGCAACGGTAACCTCCAA         |
| EQ-254 | AGAAGAGGAAGCGGAAGAGG   | CGGATTTTCTGCATTTGGT          |
| EQ-260 | TTATTTGGATGTGGGCCATT   | GCGGTAATGCTAGGGTTCAG         |
| EQ-265 | CCATTTTGATGATGCTCACG   | GTCCATTTCCAGCCACTGTT         |
| EQ-266 | CGCTCTCTCTCTCCTGATCG   | ATGGGGATTCTGTAACGCAG         |

| Marker | Forward primer (5'→3')  | Reverse primer (5'→3')    |
|--------|-------------------------|---------------------------|
| EQ-284 | AAAGAACGAGGCAAAAGCAA    | TATGACACACCCAACATGCC      |
| EQ-286 | GAGGGACTGCTCATGGGATA    | CAACAAAAGAATGGCTGACG      |
| EQ-287 | TTCTTCAGTTTCAAGCAAATTCC | GCAACCTCCATCACAAACCT      |
| EQ-291 | CATTCCCAAGCAAAACAACA    | GAACCCCTGGATGGATGAGA      |
| EQ-298 | CACCGCGATCAGTATGTCAC    | CAGCGCAAAAATTTCGGATAC     |
| EQ-299 | CCTGAGGAAGAGGAGGAGGT    | CCCAGAGTCTGCTTTTTTGA      |
| EQ-304 | TTTCTAAACCCCCAAAACCC    | AGACGACAACGGAAAACAC       |
| EQ-305 | ACGATCTTCCAACCAACGAC    | CCTTGTGATGGAGTTGCCT       |
| EQ-308 | TTATTGTTCGAGGGGACTGC    | GGGACTGAACGAAGTCAGGA      |
| EQ-313 | TGATCTTGATCAGGTCAGCG    | ACTTGCACAATCGGCACTC       |
| EQ-314 | GTTAAGGGTCGCAAGGCATA    | AACAGCAGCACATGAGATCG      |
| EQ-320 | GTTAGGGCTGAATCATGGGA    | TGCTTTCTCCATTGCTTGTG      |
| EQ-321 | CCAATTGGGTGCTTCTGTTT    | CCTCTCTCTCTCCTTCCTTTTG    |
| EQ-324 | TGAGCAAGTGTTCTGCAACC    | AAAACGTTTCTTGCTGCATTT     |
| EQ-330 | TGCATTTTACAGAGGGAGGG    | GGGCGTTAATTTCGGTTTTT      |
| EQ-332 | GGGTGGGGTTGGTTTAATCT    | TGAGGTCAAAAGCATCAAAGG     |
| EQ-334 | ACATGGAGGAGGTGGTTGAG    | GCTGTGCAGTGAGTTTCTCG      |
| EQ-338 | GCCTTCAAAATCGACGTCTC    | TACCAGACCAAGCATGTGGA      |
| EQ-340 | GACAAGGATGGCGAACCTAA    | AAAAGAACCGGTAACCTGGG      |
| EQ-341 | CTCGATCCGGATTAGTCGAA    | CGCTGGGATGGAATAAAAA       |
| EQ-346 | ACACAACACTTCACATGCCC    | ACTCATCAAATGGCGGTAGG      |
| EQ-350 | TCGATCATCCAATGGCTACA    | ACCACCTCCTTGTTGTCTGG      |
| EQ-353 | ACCTCCCAAAATTTTCCCAA    | AAGCCAGATCCTGCTTTTCA      |
| EQ-354 | AGTGTCGTGCAACAATAGCG    | ACCTGACCCTTCACGATGAC      |
| EQ-355 | CTTGACCTTCCCATGTTTT     | TGTGATGCTATTGCCACCAT      |
| EQ-357 | TGTTGCTCTCATTTTCTCTCCA  | GGAATTTGTGGAATTCAAAACC    |
| EQ-359 | GTGGGGGTAAGTGCTGCAT     | GTAAGCTCATGGGGCACATT      |
| EQ-360 | TCTCTCTCTCAAACGCTCCC    | TGCAATGTAGCAGAAATCGC      |
| EQ-363 | GAAAACACCCACTTCGTCTGT   | GGTTTGGGCATAAAATTAGGG     |
| EQ-375 | TTTGAGTTGCTTTGTCAGTGG   | CATCTCAAAGAAAAGGGCG       |
| EQ-380 | TCTCCATTTTCTGGAACCG     | GTGACTCCTCCCTCTCCTCC      |
| EQ-386 | TTCCGGACAATCAGTAAGCC    | AGGAACAGGGATAACAGGGG      |
| EQ-388 | TCCTATCCTCAACAGAGCGG    | GTTGGGTGGTGTGGACTCTT      |
| EQ-389 | AGGACCACGAATTGGACTTG    | CCTTGAAAATAATTCTCATAATTGC |
| EQ-391 | CAGGAAGGAAATCGATTGGA    | CCACGGTTTCTTCCAGACAT      |
| EQ-393 | GAAATGGAGGAGACGGAACA    | TACAGCACCGAGCACACTTC      |
| EQ-398 | TTGCTGTTCGATGCTGGTTAG   | CCATGGAAACAAAATGGGAC      |
| EQ-401 | CCCACGGAAGAACTCAAAA     | TTGTTTTGGAAGGCCTATGG      |
| EQ-416 | GTCCACCGGCAACTACTCAT    | AACCCTAACCCTCTTCCCAA      |
| EQ-417 | GGGGAGAGCGAAAATGAGAT    | TTCTTCTTCATCCTCATCAAATTC  |
| EQ-424 | CAGAAGCATCCGATACGACA    | CAGGGTTTCTCGTTACCCAA      |
| EQ-425 | TGCTCTCGAAACCATAACCA    | ATCCTCTTGCTCTTTCAGCG      |
| EQ-426 | TCTACCATACTCGCCCCTTG    | GGTCTCCACACCATCACTCC      |

| Marker | Forward primer (5'→3')   | Reverse primer (5'→3')   |
|--------|--------------------------|--------------------------|
| EQ-431 | TTCTTGCCGAATTTTCAGTCC    | ATGGCCCAGTGTCTCAGATTTC   |
| EQ-435 | TACGCCTCCCTCTCTCTGTC     | AGCCAGCCCCCTTAGAACAAT    |
| EQ-436 | TGATGACTGGAGTGGTGGA      | AAACACAGCATTCAAAGCTCAA   |
| EQ-441 | GGTTCGAATTTGCAGTCGTT     | GGCTGCGTCCACATTATTCT     |
| EQ-443 | AAACCGAAATCCAAACCCTT     | CCACCTCATGTGTGTTGTTGC    |
| EQ-445 | CGCCGCATATGGTACAGTTT     | GACCTCCCTCTTTGGCATT      |
| EQ-447 | CTGCTCGACGCTTTCTCTCT     | AACGGAATCTCTGCCATCAA     |
| EQ-453 | CATGTCCGGTTTCTCCTGTT     | GGATACGTCGGCACCATTAT     |
| EQ-456 | TCGGCGTGGTAGCTAGATTT     | AATGCTCGCAAAGATCAAGG     |
| EQ-457 | CGACGTCGAATGCTCAATTA     | AAAACAGGTTCTGGGTTTGC     |
| EQ-458 | GGTGAAGGGGAAGTCAGACA     | AATGCTCCTGCCTGAAATTG     |
| EQ-466 | AGCGCGAGAGACAGAGAGAG     | TCTCTCCTCTTCCAAAGCCA     |
| EQ-475 | TGTAGGCTGGGTATTGGGAG     | TTCCCCATGCATAAACCTTA     |
| EQ-489 | CTTTCCCTCCGTACAATCCA     | ACACAAGGAGTCGTTGGCTC     |
| EQ-490 | CTTTCCAAACGCTGCCTAAG     | GCCGTTGTGTAGATCCGATT     |
| EQ-494 | CAGCCTCAAGGCTCTCAAAC     | GAAAGCAGTTGTGCCAATCA     |
| EQ-501 | AGTGCACTGGTAGACCCAG      | GAGTGCAGGATTTGGGTGTT     |
| EQ517  | TGTGCTCCTGCTTTGAAGA      | ATGCATACATGGCGAATTGA     |
| EQ519  | CACCGTTCTCCACATTGCTA     | GCAGCAGGCAGTGAGAAAAT     |
| EQ522  | GAACCATGGAGAGCGTGTTT     | TGGTTTTTGCAAAGGGTTTC     |
| EQ530  | CATCGAGACCGGATATTGCT     | GTGGATGGAGAGAGAGAGCG     |
| EQ531  | GGCTGAATGCCTCCAAATTA     | GAACACCACCAACAGCACAC     |
| EQ535  | TCAGGAATTTCTGGTTGAACG    | AACACAATTCCCGCAAAAAG     |
| EQ538  | TATTTTCGCTCTCCCAATG      | TATTGCCATTGCCATCTTCA     |
| EQ549  | GGAAGAGAGATGGAGGGAGG     | CCATAAGCCCCATTCAAAAA     |
| EQ576  | AAATTGGCATGAAAATTTCGC    | ATGGGTGTTTATTTCGAATA     |
| EQ580  | CCCCCTGAGCTAACTTCAAC     | ACGGACAAATCCCAATCAAA     |
| EQ583  | AACACGAGGTTTCTCTGATGG    | TGTTTTTCGCCTAAAGCACG     |
| EQ586  | GATGCCTCCTGAAGATTTCG     | GCAATCAATCATGCTGGAGA     |
| EQ590  | TATAAATCTGGCCCCCTCCCT    | AGCATGGGCTCCTACTGCTA     |
| EQ592  | CCCCAAGAACAAGTCCACAC     | GCGTTTGGTAAACACCCAAT     |
| EQ593  | CGCCTCCTTGGTGTCTTTAC     | AAGTTCCACAAAGAAGCCGA     |
| EQ594  | TTCGTGAAACCTTTGGAACC     | AAAAACGGAAATCCCAATCC     |
| EQ597  | TTCTTTCTCTCTCTTCCCCG     | TTCTATTTTCATCCGTCGCC     |
| EQ632  | CGCCTCATCAGAGAGAGCTT     | AAGTGCTCCAATAAGAAAGAAAGA |
| EQ634  | GAAACACAACAAAGTTAACCCAAA | GGGTTTCCGTCAAGAAACAG     |
| EQ640  | TTACTAACGGCAACGAACGA     | TTTCGTTTCCAGTCCCAGTC     |
| EQ642  | CGCCGTTAGAGATTCTTGCT     | GCAGCAGCTCTGCTCTCTCT     |
| EQ643  | TCCTGAGCTACTGCGGTTTT     | GAGTCGATTTCTAAGCCGGA     |
| EQ650  | TGAAGCCTCGCGATAAATCT     | GAAGTGAATGGAGTCGGAA      |
| EQ658  | ATCAGTTCAGGCAAACTGGG     | CCGATCAACAGAGCTGAACA     |
| EQ661  | TATGCTCCGTGTCAACATCC     | GAAGGACCTCAAGAGCATGG     |
| EQ672  | TGTAATTGGTGGGTGCAAAA     | CTTGGGGAGTTCTTGGTGAA     |

| Marker | Forward primer (5'→3')  | Reverse primer (5'→3')     |
|--------|-------------------------|----------------------------|
| EQ681  | CGTCAGGGCCATTCTGTATT    | TGTCCGAACACTTGCTTCTTT      |
| EQ687  | GGGGCTCCTTGCTATATTCC    | ATGTTGGAACTCCGCCAATA       |
| EQ701  | GGAGTTCGTGTGTGGGTTCT    | AGACGGCAACGATACCAATC       |
| EQ702  | GATTGGTATCGTTGCCGTCT    | CACCCCCAATTACACACACA       |
| EQ708  | GAGAGCTCGCGGGTTTAGAT    | AGAACGTCGTACATCTGGG        |
| EQ709  | TCAAGCAAGATTAACCATCATCC | CAAAAGGCGAAGAAAATGAA       |
| EQ731  | TTCTCCATTATCGCCTCCAC    | GAATTGGAAAGCAGCGAAAA       |
| EQ733  | CCCCCTTCCATTTCTCTCTC    | GGGGAATCCGATCTCTCTCT       |
| EQ736  | ATCCGAAACTCTCGTGATG     | TTACAGCTCTCCGCCATTCT       |
| EQ765  | CACTGCACACACACATGCAG    | TAGGGCTAATCCAAGGGTCA       |
| EQ767  | GCCTGCAGAGGAGTGAAGTC    | GGTTTCTTCTCTCCTAATCCCC     |
| EQ768  | CCACCACCTCCATCTCAGTT    | GAATTCGCCTGAATCGGATA       |
| EQ773  | ATCCCTGACATTGCCTTCAC    | CCCATTTGATTTCCCTTTT        |
| EQ781  | CGCAGATCATAGGTGAAGCA    | CGGAAAACGAAGAAAGAACG       |
| EQ788  | AAGCGAATCACACTTGTCCC    | GGGTCAACAACCTCGAAGAA       |
| EQ792  | GCAATTAGAAACAAATATGCCCC | CTGCTCCTCCTTCCAATGAC       |
| EQ800  | TCAATTCCCGTAGATCCGAG    | TTGTACTGGGTTCAAACATATTCA   |
| EQ812  | GATTTGCACTTGGATTCCGA    | CGGAGACTCGAAATCATCGT       |
| EQ813  | CACCTTCCATCTCCACCAGT    | TTGGGTCATTTTAGTTTTGGG      |
| EQ822  | GTTTTTCAGGAGAGCGAATGC   | TTCAATTCCAGTCGAAACCC       |
| EQ828  | GGCGATGGAGATAGGTGAGA    | GGAAGGTTTCGCAACTCCTA       |
| EQ832  | CCAAAAGCGGATGAGAACAT    | GTTTCATGACCCAAGGCATTT      |
| EQ844  | CTGGA AAAACGAGGCTCTCAC  | AATCAATCTCGTCTCCACCG       |
| EQ846  | CGCCCTAGCTTCTCATCAAC    | TTTTAGTGTGAGAGAGCGGC       |
| EQ854  | CTGTGCACTCCAACGATCAA    | CGGCTTCTTACAGAGTAGGGAA     |
| EQ855  | CCGGCTAAAAGTGTTCCTGA    | TGGTTTTTGTGTTCAACCGA       |
| EQ863  | CCGTTTCATCTTCGGACAAAT   | TACCCCTCTCACAAAATGC        |
| EQ864  | TCATTTGGCTTCCGATTAGG    | TCTCTCTCCTCATTTAACCTGTTTTT |
| EQ873  | GATGATGAAGAACGTCGAAGG   | AAGGGTGGCCTTTTCTTCTC       |
| EQ882  | CTCTCCACCCAAAGGTGTGT    | ATCATGCTTCCGTCCAATTC       |
| EQ901  | AGAGAGAAGCGACGATGGAG    | TAGGGTTCTCCATTTCCACC       |
| EQ904  | GGATGAAGGAAGAAATGGCA    | TTCCACGTACCATCACCTCA       |
| EQ905  | TGATGGTACGTGGAAGGACA    | CCCCCATAAAGAAAACCCAT       |
| EQ912  | TACTAAGCCAGCAGGGATGG    | CCACCACCACGATTTCTCTC       |
| EQ929  | CCTCCCTCCCTCTCTCAACT    | CCCTCTCTCCCTCTCTCCTG       |
| EQ945  | AGTGCCGGAGAAAACAGAGA    | TTGAACTCTATTCCAATTTCTTTTCG |
| EQ946  | GCCTGGAAATGCATAAAGGA    | AGGTCCTCCAGGAGTAGGGA       |
| EQ947  | CCAGATCAACACCATCATCG    | CAACAACACCGCCTACCAC        |
| EQ954  | ATGGGTTTCTCTGTTTTGCG    | GGTTTCGACAACCTACCGAT       |
| EQ956  | ACGAACTGCAACACCAATCA    | AACCTGAATTGCGGTTATGG       |
| EQ957  | CAAGCACCAAAACACCCTTT    | TCCAGGGCAGTGTAACATGA       |
| EQ958  | GGCATGGCTCAGGACACTAT    | CAGGAGAAGAGCAAAGGCAC       |
| EQ962  | TTGGGGTGTGTTTGCACCTA    | GGTACGATACGGGGATACGA       |

| Marker | Forward primer (5'→3')   | Reverse primer (5'→3')  |
|--------|--------------------------|-------------------------|
| EQ975  | GAGACAGTGAATAATGGTCAAAAA | CCCGAAGGGACTCAGTTGTA    |
| EQ993  | ACTCTGCCATACGGGTGAC      | CGCTCTGTCAAACAACCAGA    |
| EQ1025 | CCAACACACATTCATCACCC     | TGACTGTCCAGAAGGTTCCC    |
| EQ1042 | GAAGAACTGAGCCACCTCG      | AGCGGTTTCAGTGGAGAGAA    |
| EQ1043 | CACACGCACAAACATACACG     | AGCAAAACACAGACACAGCG    |
| EQ1051 | GCCGTAAACTTGGTCCTGAA     | TTTCCAACCGTTCTACCACC    |
| EQ1055 | GCTGGGCTTGTCTAATCTGG     | CAATCAATTCAAGTCACAAGCAA |
| EQ1067 | GAGAAATGGAGGATTTGGCAG    | AGATCCCATCGCCTTTCTTT    |
| EQ1072 | ACTCTCCCTCTCTCTCCCA      | CTCAGGATACTTTGAGCCGC    |
| EQ1093 | AAGAAATTCATCGCGTGCTC     | TGAAGGTGGATCGCGTTAGT    |
| EQ1107 | ACTAGCGGTAACCATGACGG     | ACCTCTCTCTGCCTCACCAA    |
| EQ1118 | CCAGAGAAATGAACCCCTGA     | ACAACGGCTGAGAGGAAAGA    |
| EQ1122 | GATGGGAAGAAAGCCATGAA     | TTCCATTCAACAACACTCCC    |
| EQ1135 | GCCTCCAATTTGATCTTCCA     | TCCAGAAGATGAGGAGTTGTTG  |
| EQ1151 | GGGTGATTAGGACCACCCT      | CAGCGAAAACGAGAACAACA    |
| EQ1164 | CACCTGAAGGCTGTGAGTGA     | GATGTCGGCGTAAACTTGGT    |
| EQ1178 | CGAGAGGAAATCAGGAACGA     | ATCGACGACGAACACCTACC    |
| EQ1191 | GGCTTCACCTTCAAGACTGC     | AGCGAAATCACACCCAAAAA    |
| EQ1202 | CCGATCTTCGTTTCCGATTA     | ATCGATCCAGTTCCATCAGG    |
| EQ1205 | CTTGGCAGCATAGCCAATCT     | CTTCCCTGCAATCCATCAAT    |
| EQ1207 | CGTTGAGGTACGCCTTGAAT     | GTTACCACCGCCACTCAACT    |
| EQ1214 | TAGCTTGAGGAACTACGCCG     | GCAACAAACCGCAAATTCCTT   |
| EQ1227 | TTTTACTTTAGGCCAGCCC      | AAAAACATTCATCCATACCCAAA |
| EQ1235 | TGGACTTTGGATCGGTCTTC     | GGAAATTGTGGCCAAGGTAA    |
| EQ1243 | ACAGCCAGATCATCCACAT      | ACTAATCCAGCAGCCACCAC    |
| EQ1252 | TTTCCGTTGCCAATGTTTCT     | GAAGACTGGAATTGAGGGGC    |
| EQ1256 | GGAGGGCAGCAATTAAAGAA     | TGATGCTTACGAGCAAAGTGA   |
| EQ1261 | CCGTCACTGTCGCTAGATCA     | TTTGACACTTCGCACCTCTG    |
| EQ1263 | TGGGACAGTGGATCTCATCA     | CCACCCTATCCACCCATA      |
| EQ1272 | CGTTGCCATTGTTGTGGTAG     | TTACCCCTCTCATGGTCCAG    |
| EQ1281 | CTTTCACATCTCAGCCTCCC     | TCGGGTTTTAGATCAATCGG    |
| EQ1291 | GCTCAATTCTCGAACAATGCT    | TGACCCAACAGCAAATCAAA    |
| EQ1298 | CGCAAGAAGAGACAGCACAG     | CTCCTCAGCCTAGTGATCCG    |
| EQ1306 | CCATCTGGACATTTTCCACC     | AAAATCAAGTCGGATCGTGG    |
| EQ1307 | GCCACTGGAGGTTTTCATGT     | ACAAAACAAAACCTCCCCCA    |
| EQ1312 | AAGAACTCCATCCCAGAGAGA    | CATCTCAAAGCTGTTTGGCA    |
| EQ1317 | CGAATTCCAATTCCATGCTT     | TGGTTGAGCATGGTTGTGTT    |
| EQ1332 | ACCAAGTGGCCAAAATTGAT     | CGATCCAGGCTTTTCTTGAC    |
| EQ1333 | AGGCGCTTCATAGCCATCTA     | CATCCCTCTGTTCGCACTTC    |
| EQ1350 | GAGAGATAGAGAGAGGAGAGAAAA | ACTACTCAGCCATATGCCGC    |
| EQ1355 | TCGGAGGCTGCAAGAATAGT     | TTCTGCCGAAACCTTGACTT    |
| EQ1368 | GACAGCAGTGAGGTGATGGA     | TTCCAAGTCCCACCAAGAAC    |
| EQ1369 | AGACTTTGAGCTTTCGGCTG     | AAAACCCGATCCGATAGACC    |

| Marker | Forward primer (5'→3')    | Reverse primer (5'→3')   |
|--------|---------------------------|--------------------------|
| EQ1372 | CCGAGTTTTTCCCAGTGTGT      | CCACCATTCTAAGGAGGCA      |
| EQ1376 | GGTGTGCTGTTTTTGGATT       | GATGACCATCGCCAATCTTC     |
| EQ1383 | TTCGGTTTTGGACTTTCCAC      | ATACGCATCTCCCTCACACC     |
| EQ1387 | GTGTTACCCACCTCACATGC      | TTTTGGGACGAATCACCAAT     |
| EQ1390 | TCACATATCAAAACGCAGGC      | TCCATTGCAGCATTGTTTTC     |
| EQ1407 | TTTCAGGATGGAAGAATCGG      | GGACCAGGCATCGTCTCTTA     |
| EQ1425 | TGCCTCCAGTGGTCTTCTCT      | CAAGCACCCATATTCAACCC     |
| EQ1440 | TCTCAAAAACAAAGAGGCAAGTT   | CAGGCAACTGTCATGATGCT     |
| EQ1453 | TAACCCTTCGTCATCTTGGC      | AGTCTCAACCCCTTCGGGTCT    |
| EQ1454 | TCTTGCTGACGTCCCACTG       | TGAACCAGTGAACCTGAGCG     |
| EQ1461 | CGCATGACATTGAATTGAGG      | TCGGGAAACCATTATGTGAA     |
| EQ1468 | TGGGTTTAGGATCTTCACGC      | AAAACACACCCGCGTAATTC     |
| EQ1479 | TCTCGAAGGCCGAAAATAGA      | GGGTTGTCTGAGCTTGCTGT     |
| EQ1482 | TCCACCTGGTAGGAGTCACC      | TTGGAGAGGGAAACCAACTG     |
| EQ1483 | ATCAACGGTTGGATTTGAGC      | GGATCTCCTCCTTCACCCTC     |
| EQ1484 | GATTAGGGCAAGCGATTGAA      | TACAATCCAAGGGGCAAAAA     |
| EQ1508 | TTGAAGAGAGAGGGGAAGCA      | CGAAAAGTTGAAACCCTGGA     |
| EQ1509 | TCCAGTGATTGTGCCATGTT      | CCTCACTCAGCACTCCCTCT     |
| EQ1524 | AAAGACGACATTCCCTGCAC      | TCACCTTCTCATTGGCATAAA    |
| EQ1525 | TCATCGCTTTCGCATGTTAC      | ATTGATATTTTTGCCGACGC     |
| EQ1537 | ATGACGGCAAGAATCAGGTC      | TTTCGAACAATCGCAAACAG     |
| EQ1545 | CATATAGCGCCTCTCTCGCT      | CCGTTCCTTGAAACCACACAA    |
| EQ1548 | CATGCATTTGTGTTTTTGGG      | GCGCAGTGACTGAAAATGAA     |
| EQ1550 | AGTAAGCTGTCGCGGACATT      | ATCGTTCTCTACCACCGCAC     |
| EQ1557 | GCGAATTCAGAGGGAACAA       | AGATAGCCGAGTCCGTCAAA     |
| EQ1583 | TGCTCAAACCTGCAACTGGTC     | GAAAAACCTTCTATCCGCATGT   |
| EQ1590 | TTTGGATTGGGAGAAAGTGG      | AAAATTTGGGTGCAAACGA      |
| EQ1591 | AGGAGCGTTCTTGAGGATGA      | GTGTTTCGGACCACCTCGTAT    |
| EQ1593 | TGAATAAATAAAGCTCCACCAAAA  | TCATTGTTTCGCCATTGTTGT    |
| EQ1598 | AAAGGACTGCTCGAAGGTGA      | AGCACCAAAAGGAAAGCAAC     |
| EQ1600 | GGTGGCGGTAGTTGTAGGAA      | ATGGGCAGATCAGACCAAAG     |
| EQ1611 | ACAAGAAGGCTCCATCATCG      | TCACGAAAATCGCAATCGTA     |
| EQ1628 | TGAGTAGGAAGGAGAATGAGAGAAA | GGGAACCCAACCCTCTATGT     |
| EQ1633 | CTCTACAGTGGAGGCGACG       | CCTCCAACCTTTAAGCTCCC     |
| EQ1636 | CAAGCCAAGTATCTCGGAGC      | CGACCCAACTAGGCAGTGT      |
| EQ1651 | CCTGAACCAGGTTTTTGAACA     | AGTGTCCTCACACCCACACA     |
| EQ1652 | TGTGTGGGTGTGGAGACACT      | TG CCTCCTTTGAATCCTTG     |
| EQ1666 | ACGTTTTCGTTGGAGGTCAC      | CTCTCGCGCTCACAATCTTT     |
| EQ1670 | TTCCCACTCGGAGGTAGATG      | ATGGGCGGAGAAAATCTCTT     |
| EQ1674 | TCGTCTTCCTCTACTGGTTCTACTT | GACCTTGAACCAGACGATGT     |
| EQ1684 | ATACTCGGGTAGGACCCCTG      | AAACGATGGTCTTGGTCCTG     |
| EQ1686 | AATGATCGCCGGTAGTGAAG      | TCTCTCTTTCTCGTTTCTGTTCG  |
| EQ1690 | GGATCCAAAGGCAAGAATGA      | CAACATGAAGAAACACATACATGA |

| Marker | Forward primer (5'→3')    | Reverse primer (5'→3')  |
|--------|---------------------------|-------------------------|
| EQ1694 | TATCCCTTGCATCGATTTC       | TGAGCCTCTCAGCCCACTAT    |
| EQ1700 | AGACCAAAGCTTCCTCCCTC      | GTGTGTGTTTCCTTCATGGGC   |
| EQ1706 | ATCCTCTCTCTCTCCGGGTC      | ACCATCCACCAACCACACTT    |
| EQ1713 | GTGGTGGGGTGGAAGGTAG       | TCATTTTGTCCAAAGCCACA    |
| EQ1723 | TCATTGGAGCCACGTAGACA      | TCGCATTTGTTTCTCCACAG    |
| EQ1727 | CGCATTTATGCTGTTTGGA       | AACCATCGACCACCACTAGC    |
| EQ1734 | TGTGTTTGTCCGAATCCTCA      | TCGTTTAGAGATCAGCCCGT    |
| EQ1735 | ACGGGCTGATCTCTAAACGA      | TCACCATTCCAACATCCAAA    |
| EQ1745 | GCTGCCCATCTAAAAATCTCTG    | TTCAGGCACTTCTTGTCACG    |
| EQ1748 | GCCCTCCTCTTTTTGCTTCT      | TTCCAATTTCCTTCTTTTCACC  |
| EQ1751 | GGTATGGGGGATTGAATGTG      | AACGGCACCAACAACCTTAG    |
| EQ1759 | GAAACCACAAAGGAGACCCA      | CCTATACCTTGTCGCTCCCA    |
| EQ1762 | CCTTAGGGATGGAAGGGTGT      | GGAACGATTGTGAATGACGA    |
| EQ1766 | GCACACCGGAGACATAGGAT      | CTCCGGCTGACTCATCTTTC    |
| EQ1767 | CCTTGTTTCTGTTAGAAATTGATGG | ATAAACGATGTCTCCCGCAC    |
| EQ1768 | CTGTGAGCGAATCACAGCAT      | CGCTTCCATTCTATCCAAA     |
| EQ1771 | TGCCCTTCCACTCTCACTTT      | TTGAATCCGAAGCTGGAGTT    |
| EQ1780 | TCCGGGCTAGAAATCATCAC      | ACTACCACCATGCCATCTCC    |
| EQ1788 | TAACGGAATTTCCACTTCGC      | ATCGGGATTAGGGTTTTTGG    |
| EQ1795 | AAGTTCTCGGAAATCGGGTT      | TCTCAGCGACAGACATTGCT    |
| EQ1796 | ACCACCGAACTCACTATCCG      | AAATTTTCAGCCATTGGCATC   |
| EQ1798 | TATGTGAAGGGATCGGTGGT      | AAACCATGACTATCCAGCCG    |
| EQ1806 | AGTCGCTGGAGACCAGTGTT      | CCACACCCACACTGTTTTTG    |
| EQ1812 | ATAGAGAGAGGGGGACGGAA      | TGTCGTGAGCAAATGGAGAG    |
| EQ1813 | TCCACATGCTTGGTCTGGTA      | TCCGCCATTAAAATTTCCAC    |
| EQ1816 | TGACCACATTGACACCCCTA      | TTTTTCGGGTGGATGAAGAAG   |
| EQ1817 | GAGGTTTCGAGACCATTCCA      | GGGCTTCAAATTCAGACCT     |
| EQ1819 | ATTCCAGTGAATTTGCCTCG      | CTTCAATGGCGTTTTTCGATT   |
| EQ1820 | ACCAGACAACGAACCGAAAC      | GTGTTCCGGAGTGACATCCT    |
| EQ1821 | CAAACACCTGTCGCTCAAAA      | CAAAGGGGTAGTTGATCGGA    |
| EQ1824 | TGGTGAGTGGTTCATGTGAGA     | ATCAGATCTTCCCAGTCCCC    |
| EQ1829 | GGTGGTGCTAAGCCTCTTGA      | GAAATGGAACCGAAGGAAGA    |
| EQ1833 | CCAAGCAATCATTTCCCAT       | GTCTCTCTCCTCCGCCTTCT    |
| EQ1834 | CAACTGCCTCTACATCTTCGC     | TCATACGCGTGAATCGTCTC    |
| EQ1835 | GCGGGGACATTGGAGTACTTA     | CTTTTTTCGGCTCAACAAAGC   |
| EQ1837 | ATTGAATTGTTGACGGCTCC      | CTTCCTTTTGGCTTGCTTTG    |
| EQ1850 | GTAATCCGGTGAGGCAAAAA      | TTGAGGAGCACAGTGGTGAG    |
| EQ1854 | AAGAGGAGAACCGAGAAGCC      | AAACGGACAAAATCAACGCT    |
| EQ1858 | AGGATAGAAGGTTGCCCGAT      | TTAAATGTGAGTTGCGCCAG    |
| EQ1860 | AGGAGGAAGAGGACGGAGAG      | TATACCAATGTCGCCGTGAA    |
| EQ1870 | GACCTTGATTCCAAAACCCA      | TCATTCTCTCTAGCTCTCTCTCC |
| EQ1882 | GCTGTAAGCCAGTGACCACA      | GCCAAAGATAACACCTCCCA    |
| EQ1889 | ATGAGTTCTGCAATTTGGGG      | GAATTGCCCTTGAAGAGCTG    |

| Marker | Forward primer (5'→3')    | Reverse primer (5'→3')      |
|--------|---------------------------|-----------------------------|
| EQ1893 | CACCATGTTGCTTTCTCTCT      | ACTTGGCTTCTCTTTTGCCA        |
| EQ1897 | GAAGCAGAGCTCGATTCCAC      | AGGAAATTCGCCAGTCACAC        |
| EQ1898 | CGTGCTTCGGGAGAGTTAAG      | AGGTGGGAGAGTGGGGAG          |
| EQ1902 | GAATGACCTAGTCGTCATCGC     | GCGAAAACCAGTTCCAAGTC        |
| EQ1947 | GGAGGGAAAAAGATGACACG      | GCAGGAGGTTTTACAGCAGC        |
| EQ1948 | ACACGTGACGATAACCCACA      | TCGATAATCGGAGGTTGGAG        |
| EQ1970 | TCCCCTTTTCCCTTCAATTC      | TGATTTGGAGGAGGGTCTTG        |
| EQ1974 | GTACGGCTGTTCCCAAGTGT      | CGAGGTGTTCTGTTTCGATTTT      |
| EQ1979 | GTGGCGATCTAATGATCCGT      | TCACCAACTAAAAGGGGCAC        |
| EQ1983 | TGGAGAAGGAAGAGGAAGCA      | CTTCTCGCAATCTCCAATCC        |
| EQ1985 | TACAGGAGATCGATGTGGCA      | AAAGGAGTGCCCGACAAAAT        |
| EQ1989 | CCAAGGTGATTTGGCTTCAT      | ATGAATCCCGACAGGTTCTG        |
| EQ2033 | TGAATTCAGCACGAATGTGA      | GGTCATCGTCTCAAATACAAGGA     |
| EQ2050 | CCGTTATTGCCCTCTTGAAA      | ACGAGACGCGGTTAAGAGAA        |
| EQ2051 | GAAGCTCCATCAACATCGGT      | TCCTCAACTCCCACCTCCAAC       |
| EQ2058 | GCCGGTTCCTTACTTTTGCTG     | GTAGCATCATCCCAGGGGTA        |
| EQ2067 | ACATAACGAGGCCGAACATC      | TCTCTGAAGGCTGGTTCCAC        |
| EQ2068 | AGTCACGGACCCATTTTCAG      | TCCCTCTACTCTCTCTCCGC        |
| EQ2074 | CAGTGCTATCGGAACCCAAT      | ATTTTCGTATCACCTTTGGCG       |
| EQ2075 | GACCCGGTTGAATATGGATG      | TGCAGCTTTTTCATATCTCCG       |
| EQ2079 | CTCGGAATCTTTTTTCGAAGC     | TTGATCGGAGAGAATACGGG        |
| EQ2082 | ATATATCCACCGCGAGCAAG      | ATCGCTTGAATCTCCCATTG        |
| EQ2084 | GACGGATCTTTGCCATAGGA      | AAAAATGAAGCAAAAACACAGAAA    |
| EQ2089 | TCAAACCTCCATCTCCTTGG      | AGGGGTTTAATGGAAGTGGG        |
| EQ2094 | TTGAAATGGGGTTGGAGAAG      | GGAAAGACCAAAGATATTTATTGCTAA |
| EQ2095 | GCCCCATTTACCACTAGAA       | GAGTCTCAAAACAGAGCGCC        |
| EQ2096 | GCGCAAAGCTTAGAGGAGAA      | ACCGCTTTTTCTGTTCGATTG       |
| EQ2099 | TCGCATCGCTATCTGATTTG      | TCC TTCCTCATCGGAATTTG       |
| EQ2103 | TGTCCTCATGCCAGTATCTCA     | GGAGCCCCTTCAATCATGT         |
| EQ2105 | CAGCCATTAAAGCTCCGAAA      | TAAAATTGGATTGAAGGGCG        |
| EQ2110 | CGTCGGTATCGGTGAGTTTT      | CCAAACTTCAACACCTCCCA        |
| EQ2118 | GCCGTCAAACAGGGAAAAGT      | GGGAAATGGATTGACGAAGA        |
| EQ2119 | CGAGACATCGAATCGAGACA      | CTCCCTCTTTAACGCCTGTG        |
| EQ2122 | TGCAAATGCCATAATACCCA      | ACGCAACAACGAACCTATCC        |
| EQ2127 | TGGTGTTGAATGCGTCCTTA      | TTTAGACCCACCTTTCACG         |
| EQ2129 | TGCAATTTCACTCAAGCCAC      | GAGAGATGGACCGAAAGGGT        |
| EQ2137 | GGTGGGGTAGTGTTACTGGC      | ATTTTCTTACCCCTGGTCC         |
| EQ2140 | CAGGGTGGTGGTAGCTTTGT      | CCAACTACTCATTCAATCAAGATCA   |
| EQ2143 | CTGTTTGGCAGGACGAGATT      | GTTGAAATTCCTCGACGAAAA       |
| EQ2146 | TGCAGTCCCTGCAAAATGTA      | AGTTATGGCCGTGTTTGCTC        |
| EQ2147 | ATAAGCCCTAGCCACCGTCT      | TCCAAGTTGTTGTTTGCCG         |
| EQ2152 | GGATGATTAGGGCTGGGATT      | TTTATCGTCACGGCCTTTTC        |
| EQ2154 | AAAACGTACATTGATGGATTACACA | AGTTACAACCGCCCTTTTCT        |



| Marker | Forward primer (5'→3')  | Reverse primer (5'→3')   |
|--------|-------------------------|--------------------------|
| EQ2155 | GTGGCAAGCTAGGATCAACC    | AATTTTGACAACGGCACACA     |
| EQ2158 | CCGTCGTCGTCTTCTTCTTC    | TCCCTTCTCCCCCTACAAT      |
| EQ2160 | TAACCAGTTGTGACGGTGGA    | AAAATCAAATCCAATGGCCC     |
| EQ2161 | CCAACTCCTATTTCTACCTGCC  | TAGAGGGGGTTTGGAGGTCT     |
| EQ2168 | TTGCTGAGATTTGGGGTTTC    | CCGTCTCTCTCCCTCTCTC      |
| EQ2178 | CACCACCCCTTTCACGTAGT    | CCAACGCTTTCAGTTTCTT      |
| EQ2190 | TGCCTTGTGCAAGAGAATTG    | GGGAGGGAAAATGGCTTAAC     |
| EQ2192 | CCCCTATTCAACTTTTATGCAA  | GGACTCGGCAGCTTAGTGTC     |
| GEU026 | CAGCCACTCAATACCGAATC    | CACCAGAGGCACAAGCATAA     |
| GEU037 | TGGTTCTTGGACATGCTCTG    | ACGCAATTTCGATTACGTGGT    |
| GEU045 | CATCGTCATTCTTCTCCTTGC   | CACGACACACTGAAGATCCA     |
| GEU052 | TGCTATATGGTTCTTCAGGCTCT | TGCGTATTGGAAGATTCTCG     |
| GEU053 | GGTATGAGCATGAACGATGG    | AACTTCTTCGGTCAACCTTGT    |
| GEU056 | TGAAGGAGGTTGGTGACAGA    | AAGATGTCCTTCATCCTCTATTGC |
| GEU150 | CATGGCAATGCAAGCTAGAC    | CTGCCGATTCTCAGCCTATG     |
| GEU155 | CTGCCGATTCTCAGCCTATG    | TTCGTGCACTTGCGAGTATT     |
| GEU158 | CTCCACAGTCCATTCAACGA    | CCAATCTACGAAGTTGCCAAG    |
| GEU219 | ATGGTCCTTGATCGCTCATT    | TCGCAACACTTGATCTCCAC     |
| GEU223 | TCGCAACACTTGATCTCCAC    | AACGGATTCATGTAATCGACCT   |
| GEU239 | CTTGAACCAGACAACCACCA    | TGCTCTCCTGCTAACTGCAA     |
| GEU271 | TGCTCTCCTGCTAACTGCAA    | GGTGCGAACAGAGAATCGTC     |
| GEU289 | TCAAGTCAAGATCACGTCTAGC  | CAATCCTGCTCAATTAACCTCA   |
