# Supplementary material
Source: MDPI journal article supplement (https://www.mdpi.com/1999-4907/11/3/311)
Supplement: s1 [file s1]

**Table S3-1.** Year-to-year correlation coefficient of height trait in *Eucommia ulmoides*.

| Traits | H2     | H3    | H4     | H5     | H6     | H7      | H8     | H9     | H10    |
|--------|--------|-------|--------|--------|--------|---------|--------|--------|--------|
| H1     | 0.52** | -0.04 | -0.02  | -0.13  | 0.07   | 0.01    | -0.08  | 0.01   | 0.01   |
| H2     |        | 0.04  | 0.02   | 0.00   | -0.08  | -0.04   | -0.11  | 0.04   | 0.03   |
| H3     |        |       | 0.70** | 0.45** | 0.36** | 0.30**  | 0.21** | 0.13   | 0.12   |
| H4     |        |       |        | 0.50** | 0.40** | 0.34**  | 0.19*  | 0.12   | 0.13   |
| H5     |        |       |        |        | 0.40** | 0.339** | 0.32** | 0.19*  | 0.19*  |
| H6     |        |       |        |        |        | 0.79**  | 0.54** | 0.37** | 0.16   |
| H7     |        |       |        |        |        |         | 0.50** | 0.48** | 0.24** |
| H8     |        |       |        |        |        |         |        | 0.52** | 0.29** |
| H9     |        |       |        |        |        |         |        |        | 0.41** |

\*p ≤ 0.05, \*\*p ≤ 0.01

**Table S3-2.** Year-to-year correlation coefficient of ground diameter trait in *Eucommia ulmoides*.

| Traits | GD2    | GD3  | GD4    | GD5    | GD6    | GD7    | GD8    | GD9    | GD10   |
|--------|--------|------|--------|--------|--------|--------|--------|--------|--------|
| GD1    | 0.47** | 0.01 | 0.04   | 0.00   | 0.03   | 0.01   | -0.09  | 0.09   | 0.06   |
| GD2    |        | 0.10 | 0.10   | -0.02  | -0.05  | -0.05  | 0.01   | 0.01   | 0.01   |
| GD3    |        |      | 0.92** | 0.49** | 0.34** | 0.25** | 0.31** | 0.24** | 0.25** |
| GD4    |        |      |        | 0.51** | 0.30** | 0.22** | 0.28** | 0.25** | 0.35** |
| GD5    |        |      |        |        | 0.73** | 0.61** | 0.59** | 0.55** | 0.51** |
| GD6    |        |      |        |        |        | 0.84** | 0.82** | 0.71** | 0.23** |
| GD7    |        |      |        |        |        |        | 0.78** | 0.71** | 0.24** |
| GD8    |        |      |        |        |        |        |        | 0.73** | 0.33** |
| GD9    |        |      |        |        |        |        |        |        | 0.28** |

\*p ≤ 0.05, \*\*p ≤ 0.01

**Table S3-3.** Year-to-year correlation coefficient of crown diameter trait in *Eucommia ulmoides*.

| Traits | C4   | C5     | C6     | C7     | C8    | C9     | C10    |
|--------|------|--------|--------|--------|-------|--------|--------|
| C3     | 0.13 | 0.63** | 0.06   | 0.02   | -0.01 | 0.04   | 0.02   |
| C4     |      | 0.13   | 0.37** | 0.22** | -0.04 | -0.03  | -0.07  |
| C5     |      |        | 0.04   | -0.10  | -0.09 | 0.03   | -0.06  |
| C6     |      |        |        | 0.19*  | -0.09 | -0.08  | 0.29** |
| C7     |      |        |        |        | 0.16* | -0.11  | 0.42** |
| C8     |      |        |        |        |       | 0.34** | 0.52** |
| C9     |      |        |        |        |       |        | 0.50** |

\*p ≤ 0.05, \*\*p ≤ 0.01

**Table S3-4.** Correlation coefficient between traits in different years in *Eucommia ulmoides*.

| Traits | 1a     | 2a     | 3a     | 4a     | 5a     | 6a     | 7a     | 8a     | 9a     | 10a    |
|--------|--------|--------|--------|--------|--------|--------|--------|--------|--------|--------|
| H-GD   | 0.80** | 0.83** | 0.66** | 0.71** | 0.55** | 0.88** | 0.71** | 0.55** | 0.60** | 0.55** |
| H-C    |        |        | 0.36** | 0.19*  | 0.22** | 0.59** | 0.11   | -0.01  | 0.14   | 0.28** |
| GD-C   |        |        | 0.63** | 0.17*  | 0.29** | 0.70** | 0.22** | 0.05   | 0.02   | -0.02  |

\*p ≤ 0.05, \*\*p ≤ 0.01

1 or 1a represents the traits in 2010, 2 or 2a represents the traits in 2011, and so on.
